# Supplementary material for: Structure and formation mechanism of polymer byproducts in vinyl carbonate synthesis
Source: Royal Society of Chemistry journal article supplement (doi:10.1039/d4nj04720f), 2025-01-01
Supplement: d4nj04720f1.pdf [file d4nj04720f1.pdf]

# **Structure and Formation Mechanism of Polymer Byproducts in Vinyl Carbonate Synthesis**

Junfeng Teng <sup>a</sup>, Lili Wang <sup>a</sup>, Yuan Tian <sup>b</sup>, Xiaoyan Sun <sup>a</sup>, Shuguang Xiang <sup>a,\*</sup>

<sup>a</sup> *Institute of Process Systems Engineering, College of Chemical Engineering, Qingdao  
University of Science and Technology, Qingdao 266042, PR China*

<sup>b</sup> *School of Chemical Sciences, University of Chinese Academy of Sciences, Beijing  
100049, PR China*

## 1 Figure S1

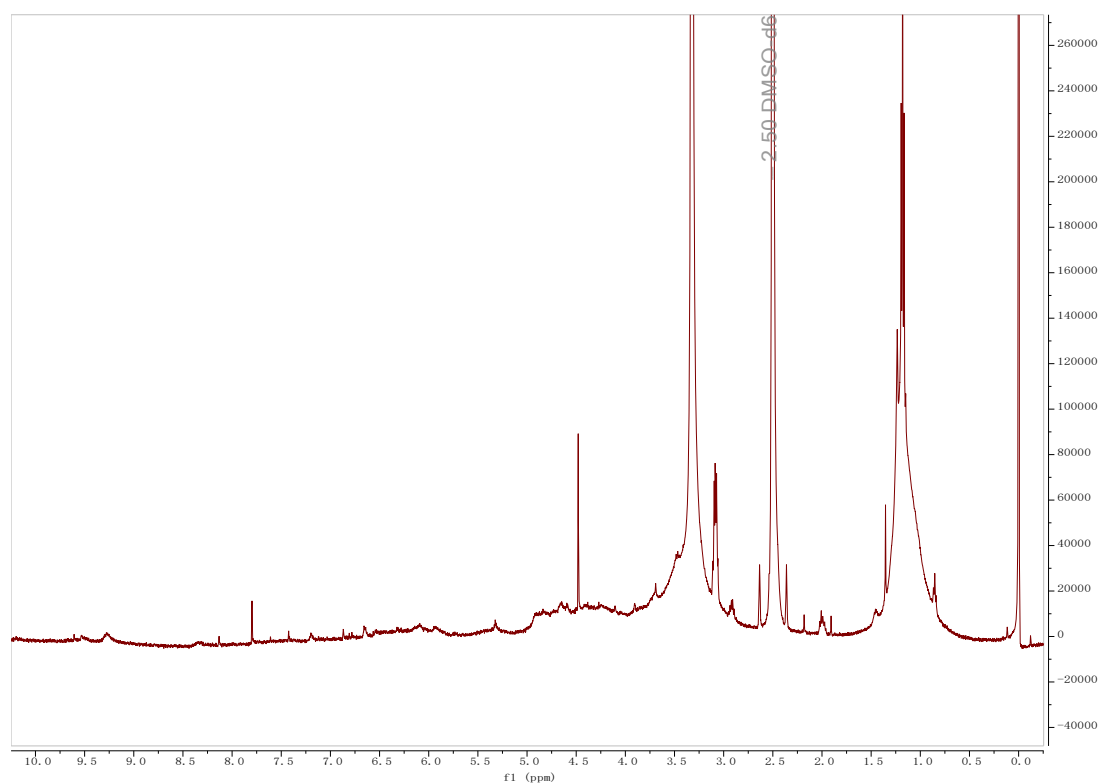

Figure S1. <sup>1</sup>H NMR spectrum of polyVC<sup>Sys</sup> (measured at 25 °C).

The low solubility of polyVC<sup>Sys</sup> in various common deuterated solvents, including deuterated dimethyl sulfoxide (DMSO-d<sub>6</sub>), resulted in a <sup>1</sup>H NMR spectrum that reflects only the chemical shifts of the dissolved component.

## 2 Figure S2

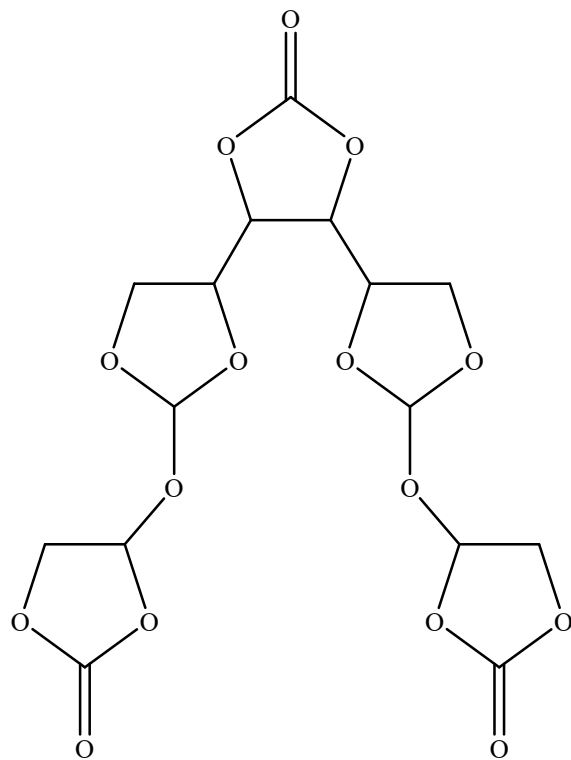

Figure S2. The structure reported in Ota's study.

### 3 Figure S3

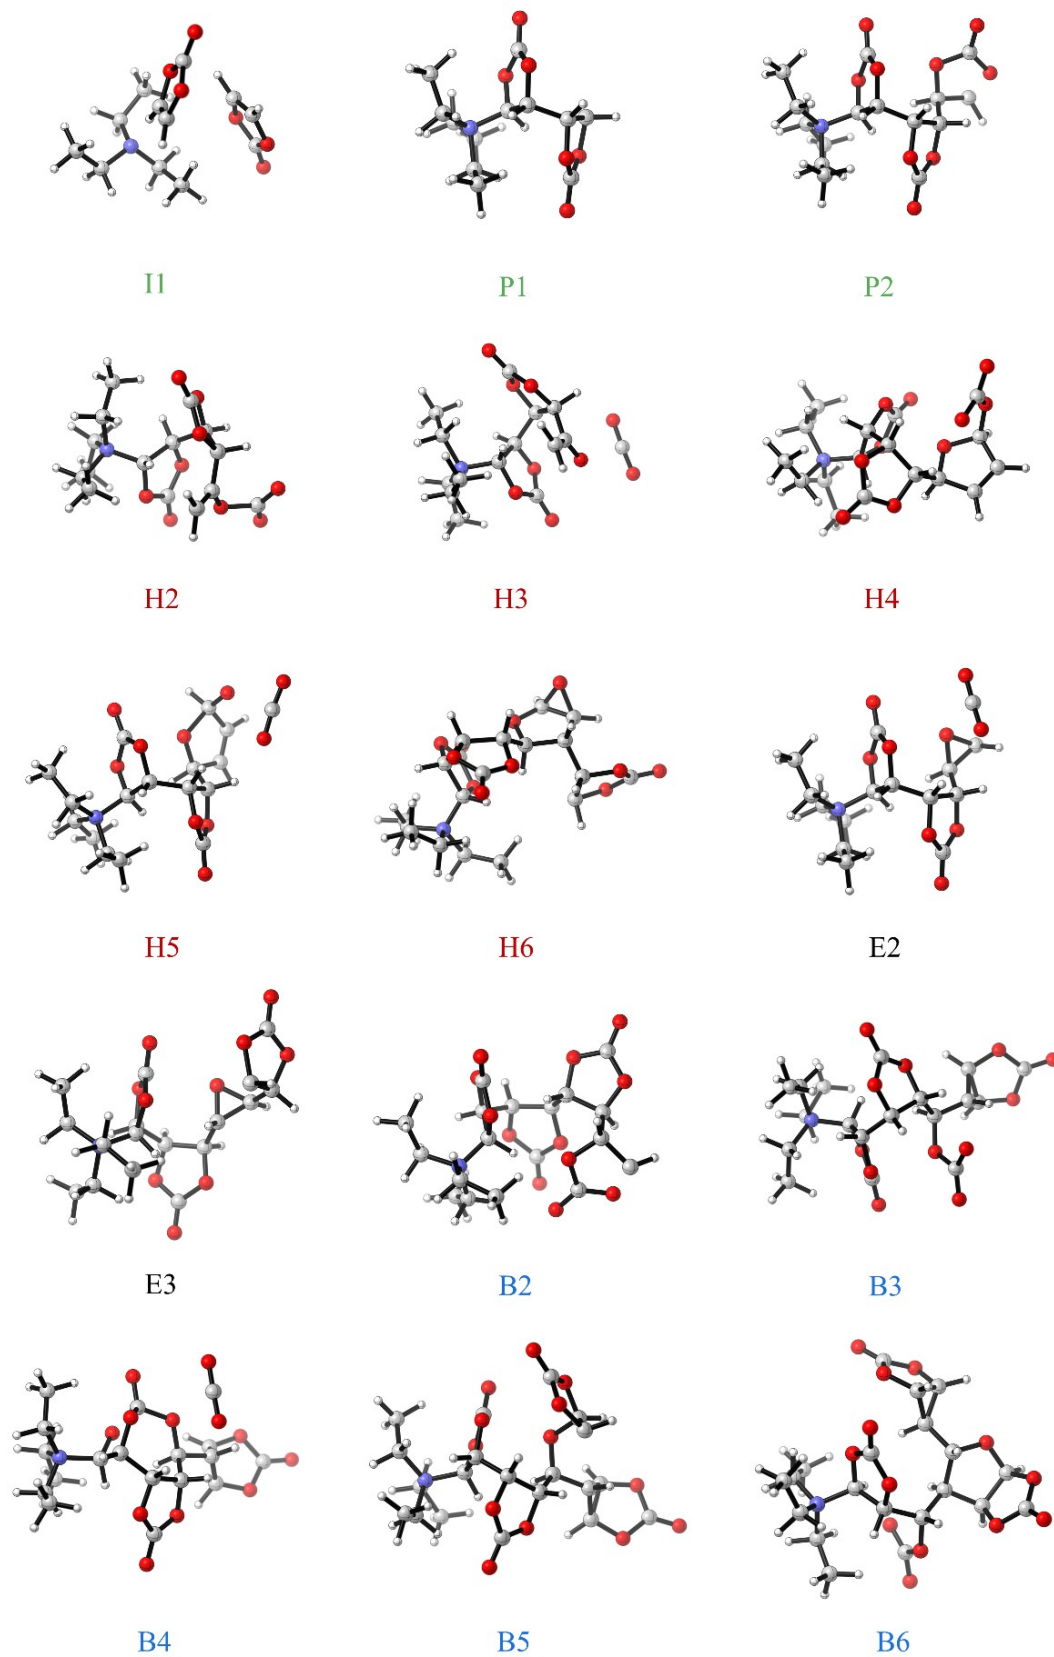

Figure S3. Structures of intermediates and minima.

#### 4 Cartesian coordinates of the transition states

##### *TS\_II*

|   |             |             |             |
|---|-------------|-------------|-------------|
| N | -1.30633600 | -1.19897900 | 0.07180800  |
| C | -2.28967600 | -1.50062900 | -1.04432500 |
| H | -3.01259100 | -0.69302700 | -1.04276800 |
| H | -2.79708100 | -2.41693100 | -0.74389300 |
| C | -0.27207800 | -2.30621400 | 0.09796700  |
| H | 0.24457700  | -2.25859300 | -0.85661400 |
| H | -0.83394900 | -3.23908000 | 0.13043600  |
| C | -2.05272900 | -1.20154200 | 1.38278700  |
| H | -1.31196000 | -1.07669800 | 2.16503700  |
| H | -2.46785000 | -2.20555900 | 1.47306600  |
| C | 0.74171100  | -2.25319900 | 1.22329800  |
| H | 0.30373400  | -2.44348600 | 2.20119500  |
| H | 1.47435900  | -3.03686900 | 1.03231600  |
| H | 1.28172900  | -1.30848700 | 1.25574700  |
| C | -3.13895500 | -0.15791300 | 1.55150200  |
| H | -3.90095300 | -0.19349100 | 0.77601400  |
| H | -3.63111000 | -0.36408700 | 2.50226500  |
| H | -2.73550300 | 0.84998700  | 1.61635200  |
| C | -1.69448100 | -1.64685200 | -2.43176800 |
| H | -1.04395600 | -2.51404400 | -2.52832100 |
| H | -2.52715700 | -1.78567800 | -3.12158200 |
| H | -1.15587000 | -0.75510900 | -2.74841600 |
| C | 0.09928500  | 0.90042400  | 0.85225600  |
| C | -0.55847800 | 0.13397600  | -0.23224700 |
| O | -1.45228400 | 1.04418300  | -0.82612600 |
| H | 0.13796600  | 0.47767500  | 1.84810200  |
| H | 0.16755800  | -0.16094400 | -1.01052600 |
| C | 2.16373200  | 0.93364600  | -1.35510300 |
| C | 1.94584900  | 1.50414100  | -0.14065000 |

|   |             |             |             |
|---|-------------|-------------|-------------|
| H | 1.94875700  | 1.20554100  | -2.36896500 |
| H | 1.69894800  | 2.53629100  | 0.05326200  |
| O | 2.86365100  | 0.90958400  | 0.74694500  |
| O | 3.01618000  | -0.18546600 | -1.14614600 |
| C | 3.43796100  | -0.13083500 | 0.11377400  |
| O | 4.20785400  | -0.89703900 | 0.62816900  |
| C | -1.49815900 | 2.19897000  | -0.10274800 |
| O | -2.21091700 | 3.11481900  | -0.39654200 |
| O | -0.67438200 | 2.13037100  | 0.91572100  |

***TS\_P1***

|   |             |             |             |
|---|-------------|-------------|-------------|
| N | -2.44543800 | -0.42740900 | 0.43773100  |
| C | -2.56978500 | -0.96413900 | 1.86213600  |
| H | -2.09516300 | -1.93884100 | 1.86410600  |
| H | -3.63864600 | -1.09966500 | 2.01738100  |
| C | -3.07611600 | 0.96619600  | 0.41554000  |
| H | -2.38138500 | 1.62824700  | 0.92823600  |
| H | -3.96383600 | 0.87387500  | 1.03851700  |
| C | -3.23662300 | -1.33600100 | -0.48889700 |
| H | -3.01671200 | -1.02219300 | -1.50490300 |
| H | -4.27873000 | -1.08764600 | -0.29310800 |
| C | -3.45962800 | 1.55051300  | -0.92964400 |
| H | -4.18043400 | 0.94068100  | -1.46996000 |
| H | -3.93907000 | 2.50546500  | -0.71341800 |
| H | -2.60630600 | 1.76901000  | -1.56503300 |
| C | -3.04569200 | -2.83405200 | -0.34446800 |
| H | -3.39126400 | -3.21064600 | 0.61568000  |
| H | -3.66466800 | -3.29314000 | -1.11548700 |
| H | -2.02611900 | -3.17213700 | -0.50731300 |
| C | -1.97049400 | -0.09390900 | 2.94788100  |
| H | -2.44327700 | 0.88257900  | 3.02856300  |
| H | -2.13357000 | -0.61567300 | 3.89064900  |
| H | -0.89398800 | 0.03589700  | 2.84113300  |

|   |             |             |             |
|---|-------------|-------------|-------------|
| C | -0.56880200 | -0.05945900 | -1.35782400 |
| C | -0.96531800 | -0.31010000 | 0.10916800  |
| O | -0.32240000 | -1.50734200 | 0.43168700  |
| H | -1.41152700 | 0.10823400  | -2.02237400 |
| H | -0.59388600 | 0.47368400  | 0.76152300  |
| C | 1.48004300  | 1.25394600  | -0.44449300 |
| C | 0.45086300  | 1.07582300  | -1.53109900 |
| H | 2.37886600  | 1.70543900  | -0.86845300 |
| H | 0.89923400  | 0.95482800  | -2.51542200 |
| O | -0.31920900 | 2.30551200  | -1.51749800 |
| O | 0.83714400  | 2.30895000  | 0.36299000  |
| C | -0.09726500 | 2.92740200  | -0.33806700 |
| O | -0.71948600 | 3.88983800  | 0.01740700  |
| C | 0.20766100  | -2.08969700 | -0.68361300 |
| O | 0.69849800  | -3.16535400 | -0.69109200 |
| O | 0.03233900  | -1.29481200 | -1.73873700 |
| C | 3.47453800  | 0.74369200  | 1.56286500  |
| C | 2.33580900  | 0.14092500  | 1.10388600  |
| H | 1.43745700  | 0.00293500  | 1.68219500  |
| O | 2.76203000  | -0.96658100 | 0.35275800  |
| O | 4.50762600  | 0.32245000  | 0.66395400  |
| C | 4.05612300  | -0.74932100 | 0.02672400  |
| O | 4.69117200  | -1.45230000 | -0.71267100 |
| H | 3.62750800  | 1.69711700  | 2.03241000  |

***TS\_E1***

|   |             |             |             |
|---|-------------|-------------|-------------|
| N | -2.44733000 | -0.33119200 | 0.13277300  |
| C | -3.00744700 | -0.75556100 | 1.48967400  |
| H | -2.59660900 | -1.73726100 | 1.69724400  |
| H | -4.07944100 | -0.85635700 | 1.32640200  |
| C | -3.00451300 | 1.06149900  | -0.17670400 |
| H | -2.45550000 | 1.76225300  | 0.44869300  |
| H | -4.02811600 | 1.03161300  | 0.19156200  |

|   |             |             |             |
|---|-------------|-------------|-------------|
| C | -2.95267300 | -1.30789500 | -0.92054500 |
| H | -2.40380500 | -1.10259300 | -1.83554700 |
| H | -3.98602500 | -1.01321700 | -1.09189600 |
| C | -3.00355000 | 1.53105200  | -1.61851500 |
| H | -3.57852700 | 0.88513900  | -2.27804500 |
| H | -3.49242800 | 2.50553400  | -1.61134000 |
| H | -2.01035000 | 1.68670600  | -2.02831200 |
| C | -2.91261100 | -2.78885600 | -0.59256400 |
| H | -3.59084000 | -3.05344500 | 0.21545300  |
| H | -3.25740900 | -3.30449800 | -1.48888100 |
| H | -1.92388500 | -3.17394900 | -0.36044500 |
| C | -2.72080900 | 0.18170100  | 2.64471500  |
| H | -3.13872400 | 1.17714600  | 2.50905400  |
| H | -3.19703100 | -0.25551400 | 3.52207500  |
| H | -1.65844100 | 0.26200800  | 2.87138600  |
| C | -0.12780700 | -0.11969900 | -1.05377300 |
| C | -0.93103600 | -0.25304500 | 0.25465900  |
| O | -0.44131300 | -1.42975000 | 0.81488800  |
| H | -0.76032500 | 0.06306100  | -1.91709000 |
| H | -0.75159500 | 0.56903300  | 0.94135400  |
| C | 1.76557500  | 1.40672300  | 0.13545500  |
| C | 0.93414700  | 0.99323800  | -1.08825900 |
| H | 2.65922200  | 1.89932600  | -0.23860100 |
| H | 1.58596400  | 0.79491100  | -1.93539200 |
| O | 0.20401800  | 2.20439900  | -1.33644100 |
| O | 0.92285800  | 2.41745300  | 0.74041000  |
| C | 0.13800100  | 2.94119600  | -0.20465300 |
| O | -0.55727400 | 3.89826700  | -0.07622100 |
| C | 0.29199500  | -2.13885400 | -0.10382100 |
| O | 0.64996500  | -3.24905000 | 0.06375600  |
| O | 0.43833600  | -1.40877100 | -1.21643300 |
| C | 3.34035000  | 0.67149200  | 2.08193500  |
| C | 2.14833400  | 0.39305800  | 1.21192600  |
| H | 1.27371600  | 0.19344000  | 1.83535100  |



|   |            |             |             |
|---|------------|-------------|-------------|
| O | 2.54560900 | -0.86616700 | 0.68828000  |
| O | 4.10094400 | 0.16183700  | -0.64790100 |
| C | 3.60790000 | -0.92627200 | -0.34702600 |
| O | 3.78057900 | -2.07121400 | -0.71966200 |
| H | 3.97654100 | 1.39031500  | 1.53712300  |

***TS\_E2***

|   |             |             |             |
|---|-------------|-------------|-------------|
| N | -2.32414600 | -1.22734800 | 0.61007400  |
| C | -1.86817800 | -2.16273700 | 1.73432800  |
| H | -1.30850800 | -2.96434700 | 1.26725000  |
| H | -2.79090800 | -2.57479400 | 2.13838700  |
| C | -3.20824500 | -0.15004100 | 1.24779400  |
| H | -2.53442900 | 0.61485700  | 1.62714400  |
| H | -3.66404600 | -0.62908800 | 2.11133900  |
| C | -3.16310500 | -2.03800800 | -0.36320900 |
| H | -3.58104700 | -1.34170300 | -1.08283200 |
| H | -3.98963600 | -2.40256900 | 0.24443600  |
| C | -4.30128100 | 0.45990400  | 0.39156300  |
| H | -5.09973600 | -0.24749700 | 0.17933500  |
| H | -4.72331200 | 1.27582000  | 0.97774900  |
| H | -3.94257500 | 0.89736300  | -0.53614100 |
| C | -2.50513900 | -3.19329400 | -1.09313500 |
| H | -1.99799000 | -3.89548300 | -0.43630600 |
| H | -3.31128200 | -3.73253500 | -1.59124500 |
| H | -1.81420400 | -2.87053800 | -1.86784700 |
| C | -1.03411000 | -1.51415000 | 2.81977700  |
| H | -1.52720100 | -0.66700500 | 3.29425900  |
| H | -0.87590200 | -2.27221800 | 3.58653700  |
| H | -0.05045000 | -1.21067000 | 2.46367700  |
| C | -1.21739100 | 0.17881400  | -1.31775800 |
| C | -1.07595500 | -0.58976900 | 0.02048100  |
| O | -0.18826000 | -1.62364700 | -0.27093900 |
| H | -2.21760200 | 0.07401300  | -1.73653700 |

|   |             |             |             |
|---|-------------|-------------|-------------|
| H | -0.65925800 | 0.03433600  | 0.80552000  |
| C | 0.14146300  | 2.41293500  | -0.54843700 |
| C | -0.93009400 | 1.69204800  | -1.37710300 |
| H | 0.32679700  | 3.37226700  | -1.03977300 |
| H | -0.81370200 | 1.92899800  | -2.43204600 |
| O | -2.11687700 | 2.34845400  | -0.90258900 |
| O | -0.61343900 | 2.73848100  | 0.66283900  |
| C | -1.89546000 | 2.85671300  | 0.33230900  |
| O | -2.75595500 | 3.31338500  | 1.01955400  |
| C | 0.30710300  | -1.49844400 | -1.52379400 |
| O | 1.12378900  | -2.21349800 | -1.99219600 |
| O | -0.32982800 | -0.51564300 | -2.17809200 |
| C | 2.30268500  | 1.12181400  | -1.19126300 |
| C | 1.45655000  | 1.80208000  | -0.21508300 |
| H | 1.95790000  | 2.32399600  | 0.60716200  |
| O | 1.52822700  | 0.40005200  | -0.13209600 |
| H | 1.79706200  | 0.96342400  | -2.15605300 |
| C | 4.30852100  | 0.96648700  | -0.33161900 |
| C | 4.31061300  | 1.21556000  | 1.00266500  |
| O | 4.07550500  | -0.02064400 | 1.66470800  |
| O | 4.38672900  | -0.42883100 | -0.46562700 |
| C | 4.15104800  | -0.97235800 | 0.74228000  |
| O | 4.05222900  | -2.15438600 | 0.94740900  |
| H | 4.78017200  | 1.54139500  | -1.10613300 |
| H | 4.33776900  | 2.09831900  | 1.60905000  |

***TS\_H1***

|   |             |             |            |
|---|-------------|-------------|------------|
| N | -2.45426700 | -0.35067200 | 0.21915400 |
| C | -2.88916300 | -0.81838600 | 1.60778500 |
| H | -2.46227300 | -1.80552200 | 1.74514800 |
| H | -3.97093300 | -0.91615700 | 1.53945400 |
| C | -3.03262600 | 1.05069700  | 0.00445100 |
| H | -2.44452500 | 1.72761500  | 0.62072500 |

|   |             |             |             |
|---|-------------|-------------|-------------|
| H | -4.02962700 | 1.00032800  | 0.43783600  |
| C | -3.05346100 | -1.29370300 | -0.81592400 |
| H | -2.58036800 | -1.06480000 | -1.76669700 |
| H | -4.09583500 | -0.98931500 | -0.89186400 |
| C | -3.12660400 | 1.57786100  | -1.41440000 |
| H | -3.72081200 | 0.94289900  | -2.06774000 |
| H | -3.63987400 | 2.53672900  | -1.33986400 |
| H | -2.16273100 | 1.77803800  | -1.87279800 |
| C | -2.99365400 | -2.78338000 | -0.53413700 |
| H | -3.60879400 | -3.07053800 | 0.31551200  |
| H | -3.40627600 | -3.27364300 | -1.41587700 |
| H | -1.99085600 | -3.17469200 | -0.38814200 |
| C | -2.49885900 | 0.08244200  | 2.76173200  |
| H | -2.92891500 | 1.07990600  | 2.69682800  |
| H | -2.89345100 | -0.38480900 | 3.66373300  |
| H | -1.42021100 | 0.16016700  | 2.89624000  |
| C | -0.24247900 | -0.10183500 | -1.15514900 |
| C | -0.93563900 | -0.27638100 | 0.20812200  |
| O | -0.39765200 | -1.46806400 | 0.68830900  |
| H | -0.93498100 | 0.13668000  | -1.95669800 |
| H | -0.69986000 | 0.52785400  | 0.89958700  |
| C | 1.72883600  | 1.37066000  | -0.01750600 |
| C | 0.84645500  | 0.98404300  | -1.21901800 |
| H | 2.65213600  | 1.79682400  | -0.41116400 |
| H | 1.45765400  | 0.77074100  | -2.09198100 |
| O | 0.14360000  | 2.21644500  | -1.43959700 |
| O | 0.96997600  | 2.42531900  | 0.59828200  |
| C | 0.15478400  | 2.96517700  | -0.31519800 |
| O | -0.49935900 | 3.94555800  | -0.16174400 |
| C | 0.24822400  | -2.14954900 | -0.31642700 |
| O | 0.63263900  | -3.25840900 | -0.21195400 |
| O | 0.27388200  | -1.39414200 | -1.41977600 |
| C | 2.76032200  | 0.64054900  | 2.24709300  |
| C | 2.15419000  | 0.32068200  | 1.00648700  |

|   |            |             |             |
|---|------------|-------------|-------------|
| H | 1.29616400 | 0.07431400  | 1.74008500  |
| O | 2.49683600 | -0.84508800 | 0.35309100  |
| O | 4.51050700 | 0.17130100  | 0.03504600  |
| C | 3.88803300 | -0.87646700 | -0.14340500 |
| O | 4.15324700 | -1.94551600 | -0.66779700 |
| H | 2.44467600 | 1.66840100  | 2.49569900  |

***TS\_H2***

|   |             |             |             |
|---|-------------|-------------|-------------|
| N | -2.39791400 | -0.37999200 | 0.21355400  |
| C | -2.83189900 | -0.99244400 | 1.54392800  |
| H | -2.48417000 | -2.01900200 | 1.53794400  |
| H | -3.92015300 | -0.99442300 | 1.50847300  |
| C | -2.89240700 | 1.06851900  | 0.19318200  |
| H | -2.21193900 | 1.63473400  | 0.82596300  |
| H | -3.85634100 | 1.04080100  | 0.69680700  |
| C | -3.07268100 | -1.14125700 | -0.91414000 |
| H | -2.68558600 | -0.73686700 | -1.84469600 |
| H | -4.12067700 | -0.85262500 | -0.84867500 |
| C | -3.05250400 | 1.74309600  | -1.15517000 |
| H | -3.81073600 | 1.27045200  | -1.77511800 |
| H | -3.38789600 | 2.75869900  | -0.94452300 |
| H | -2.12646400 | 1.83281800  | -1.71587600 |
| C | -2.96781800 | -2.65385900 | -0.91285300 |
| H | -3.42553200 | -3.10836700 | -0.03714200 |
| H | -3.52552300 | -2.99458900 | -1.78546000 |
| H | -1.95340200 | -3.02830400 | -1.01712600 |
| C | -2.32149700 | -0.28412800 | 2.78236700  |
| H | -2.65152900 | 0.75068200  | 2.85428000  |
| H | -2.73306200 | -0.81793200 | 3.63867300  |
| H | -1.23517600 | -0.32518200 | 2.87059800  |
| C | -0.18545800 | -0.09997900 | -1.16475000 |
| C | -0.87623600 | -0.38235000 | 0.18556900  |
| O | -0.41152400 | -1.64587400 | 0.54002000  |

|   |             |             |             |
|---|-------------|-------------|-------------|
| H | -0.88825000 | 0.15864700  | -1.95216600 |
| H | -0.57972700 | 0.32364100  | 0.95531800  |
| C | 1.67425300  | 1.39401100  | 0.08389400  |
| C | 0.88236700  | 1.00921300  | -1.18209000 |
| H | 2.64966700  | 1.77252800  | -0.22626100 |
| H | 1.55091700  | 0.78212900  | -2.00825900 |
| O | 0.19798900  | 2.23448400  | -1.47573600 |
| O | 0.91937000  | 2.51238500  | 0.59299200  |
| C | 0.17108700  | 3.02614600  | -0.38112700 |
| O | -0.46620600 | 4.03000000  | -0.30822700 |
| C | 0.32503300  | -2.19804000 | -0.46555600 |
| O | 0.74828200  | -3.30107100 | -0.44181900 |
| O | 0.37713600  | -1.35590400 | -1.50565900 |
| C | 1.60051200  | 0.46707600  | 2.39649200  |
| C | 1.89490800  | 0.29838900  | 1.10113700  |
| O | 2.36717400  | -0.78988800 | 0.53762100  |
| O | 4.59189700  | 0.27540700  | 0.21456600  |
| C | 4.12291000  | -0.76447800 | -0.11566400 |
| O | 4.22355200  | -1.80789300 | -0.66130400 |
| H | 1.18413000  | 1.39436900  | 2.76404400  |
| H | 1.79208100  | -0.33490600 | 3.09739800  |

***TS\_H3***

|   |             |             |             |
|---|-------------|-------------|-------------|
| N | -3.12535600 | -0.00920800 | 0.16048600  |
| C | -3.70146600 | -0.56001700 | 1.46239800  |
| H | -3.50197600 | -1.62546000 | 1.45715900  |
| H | -4.77617200 | -0.40772700 | 1.37672800  |
| C | -3.39310400 | 1.49594100  | 0.13826100  |
| H | -2.68638200 | 1.94546900  | 0.83242500  |
| H | -4.38666900 | 1.60610000  | 0.56842800  |
| C | -3.86318500 | -0.65731100 | -1.00014000 |
| H | -3.34234700 | -0.36791400 | -1.90822600 |
| H | -4.83545700 | -0.16713000 | -1.01449800 |

|   |             |             |             |
|---|-------------|-------------|-------------|
| C | -3.34303100 | 2.21131400  | -1.19790600 |
| H | -4.07478200 | 1.83472400  | -1.90926500 |
| H | -3.59707000 | 3.25070700  | -0.98895000 |
| H | -2.35746100 | 2.21951000  | -1.65389000 |
| C | -4.06482200 | -2.16075300 | -0.96131800 |
| H | -4.72141000 | -2.47331500 | -0.15212600 |
| H | -4.55628500 | -2.42337200 | -1.89832000 |
| H | -3.14236100 | -2.73172500 | -0.90828000 |
| C | -3.16122900 | 0.05797900  | 2.73574300  |
| H | -3.34909100 | 1.12725200  | 2.81250100  |
| H | -3.68292200 | -0.42541200 | 3.56156500  |
| H | -2.09815800 | -0.13442900 | 2.87866500  |
| C | -0.86115000 | -0.06723800 | -1.14939700 |
| C | -1.61874200 | -0.25395400 | 0.17827900  |
| O | -1.37236400 | -1.57740200 | 0.51599300  |
| H | -1.47224800 | 0.39148200  | -1.92122700 |
| H | -1.24680600 | 0.40036000  | 0.96163400  |
| C | 1.30746700  | 0.86511100  | 0.16428200  |
| C | 0.41721500  | 0.78792600  | -1.08551700 |
| H | 2.30844000  | 1.14410300  | -0.16720400 |
| H | 1.00378200  | 0.53871500  | -1.96577900 |
| O | -0.02692100 | 2.15230000  | -1.20582200 |
| O | 0.77196100  | 2.02721700  | 0.84873600  |
| C | 0.10886600  | 2.78556000  | -0.02060700 |
| O | -0.34166600 | 3.86698700  | 0.20369900  |
| C | -0.74156500 | -2.23194300 | -0.51604000 |
| O | -0.57118500 | -3.40210500 | -0.53843600 |
| O | -0.61329500 | -1.39628800 | -1.55980400 |
| C | 2.26923600  | -0.32775100 | 2.25834800  |
| C | 1.39593200  | -0.37843700 | 1.07051400  |
| H | 0.52557900  | -0.30557400 | 1.82322200  |
| O | 1.39942400  | -1.46949400 | 0.31788700  |
| H | 2.40811100  | 0.73596800  | 2.54030000  |
| C | 4.20139300  | -0.58845700 | 1.31870400  |

|   |            |             |             |
|---|------------|-------------|-------------|
| C | 3.85914900 | -1.56816900 | 0.45384800  |
| H | 4.51981900 | -0.61570700 | 2.34326200  |
| H | 3.50636500 | -2.56878600 | 0.59693000  |
| O | 4.14571700 | -1.16236900 | -0.81430600 |
| O | 4.72873400 | 0.46049700  | 0.54110900  |
| C | 4.65631600 | 0.09646300  | -0.74401700 |
| O | 4.95826100 | 0.76053500  | -1.68668900 |

***TS\_H4***

|   |             |             |             |
|---|-------------|-------------|-------------|
| N | -3.02647100 | -0.35457400 | -0.00919300 |
| C | -3.62788200 | -0.95249900 | 1.26113600  |
| H | -3.23257100 | -1.95875800 | 1.34197400  |
| H | -4.69673700 | -1.01482800 | 1.06275800  |
| C | -3.56416900 | 1.07154900  | -0.14562300 |
| H | -3.04547900 | 1.67158200  | 0.59947500  |
| H | -4.60603200 | 0.99954800  | 0.16014000  |
| C | -3.50203900 | -1.17525400 | -1.19922700 |
| H | -2.92313500 | -0.85324100 | -2.06028300 |
| H | -4.52887200 | -0.85263400 | -1.36168900 |
| C | -3.48367600 | 1.73670200  | -1.50599300 |
| H | -4.02130800 | 1.19135700  | -2.27846700 |
| H | -3.97110900 | 2.70513500  | -1.39210400 |
| H | -2.46898500 | 1.93731700  | -1.83670300 |
| C | -3.47221800 | -2.68644900 | -1.07085000 |
| H | -4.17055900 | -3.05237000 | -0.32149000 |
| H | -3.79480700 | -3.07891500 | -2.03534000 |
| H | -2.48844100 | -3.09989900 | -0.86697200 |
| C | -3.35497100 | -0.18831700 | 2.54043700  |
| H | -3.75309900 | 0.82436100  | 2.53276000  |
| H | -3.85906800 | -0.73107600 | 3.33988600  |
| H | -2.29634700 | -0.16093400 | 2.79702000  |
| C | -0.66058300 | -0.02348600 | -1.07941300 |
| C | -1.51376900 | -0.30976500 | 0.17040500  |

|   |             |             |             |
|---|-------------|-------------|-------------|
| O | -1.05748000 | -1.55252600 | 0.59656800  |
| H | -1.25444400 | 0.28799200  | -1.93350100 |
| H | -1.35514900 | 0.42283300  | 0.95585600  |
| C | 1.14926100  | 1.35566200  | 0.39469500  |
| C | 0.42709500  | 1.05563400  | -0.92660200 |
| H | 2.09690300  | 1.82542600  | 0.13633700  |
| H | 1.15087700  | 0.89571000  | -1.72106900 |
| O | -0.24419500 | 2.30793600  | -1.15377000 |
| O | 0.30276400  | 2.37061800  | 0.98421100  |
| C | -0.38481800 | 2.97362000  | 0.01346400  |
| O | -1.06172600 | 3.94516100  | 0.14410800  |
| C | -0.26473600 | -2.13428600 | -0.36097400 |
| O | 0.11130500  | -3.25214000 | -0.30691200 |
| O | -0.12220100 | -1.29548100 | -1.39269600 |
| C | 2.57567800  | 0.51224800  | 2.28613400  |
| C | 1.40742600  | 0.21974300  | 1.38177200  |
| H | 0.49852500  | 0.05287600  | 1.97970800  |
| O | 1.74685400  | -0.92383400 | 0.66569600  |
| H | 2.58796100  | 1.35543100  | 2.96442200  |
| C | 3.52616000  | -0.38170900 | 2.08964200  |
| C | 3.19549700  | -1.40131300 | 1.01005300  |
| H | 4.48564800  | -0.41103900 | 2.58916000  |
| H | 2.98343300  | -2.39228600 | 1.46024600  |
| O | 3.98215100  | -1.45322900 | -0.02058900 |
| O | 3.85852900  | 1.02807700  | -1.16901100 |
| C | 4.68088000  | 0.21666900  | -1.34327900 |
| O | 5.61515800  | -0.35134100 | -1.74040800 |

***TS\_H5***

|   |             |             |            |
|---|-------------|-------------|------------|
| N | -2.66285000 | -1.01812000 | 0.34563000 |
| C | -2.29907400 | -2.19712300 | 1.24955000 |
| H | -1.71775900 | -2.87956300 | 0.64014900 |
| H | -3.25114100 | -2.66807600 | 1.48915600 |



|   |             |             |             |
|---|-------------|-------------|-------------|
| C | -3.44621600 | -0.01349300 | 1.19160800  |
| H | -2.72072400 | 0.47727200  | 1.83768600  |
| H | -4.08456100 | -0.62695700 | 1.82452000  |
| C | -3.56085600 | -1.52451000 | -0.77108300 |
| H | -3.67989700 | -0.70955700 | -1.47957200 |
| H | -4.52734100 | -1.67921400 | -0.29424500 |
| C | -4.29437100 | 1.01550000  | 0.46971500  |
| H | -5.07202900 | 0.56731500  | -0.14459000 |
| H | -4.78852000 | 1.59462500  | 1.24997700  |
| H | -3.71986200 | 1.72056500  | -0.12367000 |
| C | -3.14949300 | -2.79704500 | -1.48719200 |
| H | -3.15465300 | -3.66469200 | -0.83125800 |
| H | -3.90130800 | -2.96587000 | -2.25823100 |
| H | -2.18540900 | -2.73943700 | -1.98444900 |
| C | -1.52965100 | -1.84404700 | 2.50549600  |
| H | -2.08974500 | -1.20805300 | 3.18819400  |
| H | -1.33107500 | -2.78416200 | 3.01972900  |
| H | -0.56071200 | -1.39063500 | 2.29474900  |
| C | -1.43319600 | 0.64322900  | -1.26798400 |
| C | -1.36186400 | -0.37599400 | -0.11410600 |
| O | -0.50433000 | -1.35894300 | -0.60070600 |
| H | -2.45335500 | 0.89494600  | -1.54347600 |
| H | -0.93876700 | 0.05186500  | 0.78914000  |
| C | 0.51582400  | 2.17872900  | -0.15449700 |
| C | -0.72384600 | 1.99285000  | -1.05315200 |
| H | 1.06830000  | 3.03667600  | -0.53609300 |
| H | -0.53645600 | 2.40074900  | -2.04301600 |
| O | -1.67679100 | 2.83626700  | -0.38915600 |
| O | -0.07874000 | 2.55766100  | 1.10725500  |
| C | -1.30128600 | 3.04060100  | 0.89319000  |
| O | -1.99676600 | 3.55804700  | 1.70990000  |
| C | -0.26238600 | -1.18276600 | -1.93264600 |
| O | 0.32778900  | -1.95289200 | -2.60536700 |
| O | -0.87155000 | -0.06874800 | -2.35772000 |

|   |            |             |             |
|---|------------|-------------|-------------|
| C | 2.81827500 | 1.39274200  | 0.62282600  |
| C | 1.47625400 | 1.01885100  | 0.07801200  |
| H | 1.00302500 | 0.29215900  | 0.76163800  |
| O | 1.71756000 | 0.38175900  | -1.18223900 |
| H | 2.85243300 | 2.19730200  | 1.35021900  |
| C | 3.68981100 | 1.38943900  | -0.50535800 |
| C | 2.99115800 | 0.80082800  | -1.62725600 |
| H | 4.76217300 | 1.50660400  | -0.48231200 |
| H | 3.36974200 | 0.08966400  | -2.35575900 |
| O | 3.11678500 | 2.14797500  | -1.89064300 |
| C | 3.26873300 | -0.26708900 | 1.86405000  |
| C | 2.15922900 | -0.90156000 | 2.36121200  |
| H | 3.98562800 | 0.28690800  | 2.44722500  |
| H | 1.70809100 | -0.90622600 | 3.33496000  |
| O | 1.94640300 | -2.06115800 | 1.55504500  |
| O | 3.83093400 | -1.14374400 | 0.91229300  |
| C | 2.96861600 | -2.16020600 | 0.71434600  |
| O | 3.11994600 | -3.02384800 | -0.10746800 |

***TS\_B1***

|   |            |             |             |
|---|------------|-------------|-------------|
| N | 2.83509300 | 0.82632900  | -0.54699800 |
| C | 2.50291300 | 2.01837100  | -1.44778400 |
| H | 2.11496600 | 1.60314900  | -2.37135600 |
| H | 3.46651900 | 2.48136300  | -1.65401500 |
| C | 3.33629400 | 1.38722600  | 0.78649100  |
| H | 2.46089700 | 1.76194300  | 1.31278700  |
| H | 3.94090000 | 2.24699600  | 0.50563200  |
| C | 3.95709100 | 0.03129400  | -1.19969200 |
| H | 4.05553500 | -0.89850100 | -0.64616300 |
| H | 4.85355900 | 0.61781600  | -1.00609000 |
| C | 4.14594500 | 0.47679000  | 1.68920600  |
| H | 5.04429200 | 0.09131100  | 1.21237900  |
| H | 4.46455500 | 1.09877500  | 2.52597800  |

|   |             |             |             |
|---|-------------|-------------|-------------|
| H | 3.57192500  | -0.34144100 | 2.11334700  |
| C | 3.85733400  | -0.24165100 | -2.68910000 |
| H | 3.91699700  | 0.66737800  | -3.28297700 |
| H | 4.72283000  | -0.85396600 | -2.94225200 |
| H | 2.97208200  | -0.79643000 | -2.98692000 |
| C | 1.52648000  | 3.02447900  | -0.87797400 |
| H | 1.88765700  | 3.51034700  | 0.02633000  |
| H | 1.40742900  | 3.79848300  | -1.63615000 |
| H | 0.53046900  | 2.62001800  | -0.69877200 |
| C | 1.68466500  | -1.34253000 | 0.34358000  |
| C | 1.55267000  | 0.04614800  | -0.31341100 |
| O | 0.94291200  | -0.23276800 | -1.53741300 |
| H | 2.69224400  | -1.54400100 | 0.69505100  |
| H | 0.91682400  | 0.72175300  | 0.25238200  |
| C | -0.68620500 | -1.13329500 | 1.64315200  |
| C | 0.76664300  | -1.64291200 | 1.54006500  |
| H | -1.24283900 | -1.84592000 | 2.25572000  |
| H | 0.80067700  | -2.71947600 | 1.68821400  |
| O | 1.37351200  | -1.00883800 | 2.67150700  |
| O | -0.53147700 | 0.07704200  | 2.40688000  |
| C | 0.62303500  | 0.04201900  | 3.07583400  |
| O | 0.97470500  | 0.82939400  | 3.89403400  |
| C | 0.94651500  | -1.57670100 | -1.79137500 |
| O | 0.61074500  | -2.05314500 | -2.81718800 |
| O | 1.42930000  | -2.23321800 | -0.73128000 |
| C | -2.98705100 | -0.54469400 | 0.61391000  |
| C | -1.51196600 | -0.80153900 | 0.39912600  |
| H | -1.05587400 | 0.02599900  | -0.14602600 |
| O | -1.49394700 | -1.96227700 | -0.43725500 |
| O | -3.52967600 | -1.90875300 | 0.39353300  |
| C | -2.68808600 | -2.60992000 | -0.32156000 |
| O | -2.88780600 | -3.67874500 | -0.83226200 |
| H | -3.23142600 | -0.28668500 | 1.64630600  |
| C | -3.89479600 | 0.86906200  | -0.94845400 |

|   |             |            |             |
|---|-------------|------------|-------------|
| C | -4.75344100 | 1.81036200 | -0.49445400 |
| H | -4.10868600 | 0.01865700 | -1.57049200 |
| H | -5.75602200 | 1.76559900 | -0.11674800 |
| O | -3.95113000 | 2.89113300 | -0.03259100 |
| O | -2.66992300 | 1.51961800 | -1.15722500 |
| C | -2.72549900 | 2.69220500 | -0.49632800 |
| O | -1.79051700 | 3.44108500 | -0.37256200 |

***TS\_B2***

|   |            |             |             |
|---|------------|-------------|-------------|
| N | 2.84387700 | 0.85341500  | -0.08301400 |
| C | 2.54657900 | 2.31713700  | -0.42350500 |
| H | 2.17052300 | 2.31799400  | -1.44157600 |
| H | 3.51897000 | 2.80649400  | -0.41548100 |
| C | 3.20966800 | 0.80617600  | 1.40228600  |
| H | 2.27858200 | 0.92232300  | 1.95357900  |
| H | 3.79031200 | 1.71252800  | 1.55865200  |
| C | 4.04364900 | 0.39735400  | -0.90370500 |
| H | 4.09975000 | -0.68457700 | -0.81004500 |
| H | 4.90397000 | 0.80981500  | -0.38040500 |
| C | 4.00334200 | -0.37827800 | 1.92039100  |
| H | 4.94992100 | -0.51725300 | 1.40327700  |
| H | 4.23405300 | -0.14284800 | 2.95962400  |
| H | 3.45030600 | -1.31147000 | 1.93269400  |
| C | 4.11180600 | 0.81482900  | -2.36213400 |
| H | 4.18865100 | 1.89319400  | -2.48170500 |
| H | 5.02964800 | 0.37810600  | -2.75620900 |
| H | 3.28886000 | 0.45367600  | -2.97127700 |
| C | 1.58397000 | 3.02677200  | 0.50695000  |
| H | 1.99854100 | 3.19556600  | 1.49836600  |
| H | 1.38843400 | 4.00269100  | 0.06269700  |
| H | 0.62174700 | 2.52321300  | 0.59700200  |
| C | 1.66927100 | -1.48060400 | -0.16928800 |
| C | 1.57902100 | 0.05713500  | -0.34196400 |

|   |             |             |             |
|---|-------------|-------------|-------------|
| O | 1.22109600  | 0.21199500  | -1.68775200 |
| H | 2.65656000  | -1.80026100 | 0.15274000  |
| H | 0.79565400  | 0.51837500  | 0.26271200  |
| C | -0.75732700 | -1.63990400 | 0.95697300  |
| C | 0.67668800  | -2.15793000 | 0.79091000  |
| H | -1.36043100 | -2.45088200 | 1.36904000  |
| H | 0.68935100  | -3.22124800 | 0.56533100  |
| O | 1.19100600  | -1.96266400 | 2.11096000  |
| O | -0.59206500 | -0.66646900 | 2.00183100  |
| C | 0.47517200  | -0.99863800 | 2.73510500  |
| O | 0.78522800  | -0.50527000 | 3.77022400  |
| C | 1.22609000  | -0.97923400 | -2.34623100 |
| O | 1.02511900  | -1.09299600 | -3.50472200 |
| O | 1.47781100  | -1.97386300 | -1.48928700 |
| C | -2.48657100 | 0.00447000  | 0.11297700  |
| C | -1.51441000 | -1.09290100 | -0.26052900 |
| H | -0.84967200 | -0.71653800 | -1.02646500 |
| O | -2.21032300 | -2.17822200 | -0.84663100 |
| O | -3.86930600 | -1.18703200 | 0.24484300  |
| C | -3.54421700 | -2.20685300 | -0.45196200 |
| O | -4.21798100 | -3.14874100 | -0.79918500 |
| H | -2.56807300 | 0.33702300  | 1.13522400  |
| C | -1.50713300 | 1.68484700  | -0.47643900 |
| C | -2.76848800 | 1.01824100  | -0.91780900 |
| H | -0.87174500 | 2.07428000  | -1.26994600 |
| H | -2.85845900 | 0.65258700  | -1.93601900 |
| O | -3.83974000 | 1.90860800  | -0.61333400 |
| O | -2.03095200 | 2.78560500  | 0.31598100  |
| C | -3.34457200 | 2.90569600  | 0.15251300  |
| O | -4.02337200 | 3.76947500  | 0.63107900  |

***TS\_B3***

|   |            |             |            |
|---|------------|-------------|------------|
| N | 3.19169900 | -0.48736400 | 0.86075100 |
|---|------------|-------------|------------|

|   |             |             |             |
|---|-------------|-------------|-------------|
| C | 3.12572400  | -0.70328600 | 2.36990000  |
| H | 2.91304600  | 0.26450800  | 2.80891600  |
| H | 4.13447600  | -0.99968500 | 2.65317300  |
| C | 3.51111700  | -1.83793600 | 0.21904000  |
| H | 2.59965300  | -2.43006800 | 0.27122300  |
| H | 4.23608000  | -2.29547000 | 0.88962600  |
| C | 4.32800100  | 0.47780300  | 0.56315200  |
| H | 4.26231800  | 0.72838800  | -0.49129600 |
| H | 5.23241100  | -0.11326200 | 0.69999500  |
| C | 4.05838200  | -1.84309400 | -1.19493000 |
| H | 5.00206600  | -1.31011800 | -1.28735500 |
| H | 4.25016000  | -2.88866200 | -1.43671200 |
| H | 3.35476900  | -1.47640300 | -1.93655100 |
| C | 4.42443500  | 1.73870700  | 1.40109500  |
| H | 4.64760700  | 1.53092700  | 2.44528300  |
| H | 5.26241000  | 2.30663200  | 0.99645100  |
| H | 3.54698200  | 2.37674700  | 1.34831600  |
| C | 2.10427600  | -1.71699400 | 2.84412800  |
| H | 2.27108300  | -2.71789500 | 2.45078100  |
| H | 2.20044400  | -1.77184900 | 3.92828600  |
| H | 1.08064600  | -1.40870500 | 2.63219700  |
| C | 1.70601700  | 0.57463600  | -1.01844800 |
| C | 1.81352500  | -0.02177200 | 0.39746500  |
| O | 1.37167500  | 1.00431800  | 1.22009300  |
| H | 2.60759200  | 0.43027800  | -1.60727400 |
| H | 1.17944100  | -0.89356100 | 0.52764200  |
| C | -0.77310100 | -0.45874200 | -1.31096200 |
| C | 0.56161300  | 0.02792900  | -1.89000200 |
| H | -1.51644700 | -0.38212800 | -2.10394500 |
| H | 0.39493000  | 0.75042900  | -2.68425000 |
| O | 1.07054500  | -1.18576600 | -2.47389800 |
| O | -0.51842700 | -1.87334700 | -1.10454700 |
| C | 0.48411300  | -2.25509000 | -1.89368700 |
| O | 0.85141200  | -3.37808600 | -2.05461100 |

|   |             |             |             |
|---|-------------|-------------|-------------|
| C | 1.22889100  | 2.17369700  | 0.50624800  |
| O | 1.06233400  | 3.22822000  | 1.01368800  |
| O | 1.59446700  | 1.96066800  | -0.77024600 |
| C | -2.77062300 | -0.09961200 | 0.12692900  |
| C | -1.28949200 | 0.22809300  | -0.03675700 |
| H | -0.77997700 | -0.27045300 | 0.81768700  |
| O | -1.03523000 | 1.55610000  | -0.07315600 |
| O | -2.17472700 | 1.99905400  | -2.43724200 |
| C | -1.92499600 | 2.79536600  | -1.61291000 |
| O | -1.82728100 | 3.82063400  | -1.06886700 |
| H | -3.41706400 | 0.26470600  | -0.66572400 |
| C | -3.16927800 | -1.37779100 | 0.80633800  |
| C | -3.32160200 | -0.07554700 | 1.51508100  |
| H | -2.48604800 | -2.17363000 | 1.05836500  |
| H | -2.76708800 | 0.26225700  | 2.37691900  |
| O | -4.72152700 | 0.11580000  | 1.62898900  |
| O | -4.49312700 | -1.82312500 | 0.56809200  |
| C | -5.36370300 | -0.91341800 | 1.04706900  |
| O | -6.54901200 | -1.00561000 | 0.95801500  |

***TS\_B4***

|   |             |             |             |
|---|-------------|-------------|-------------|
| N | -3.28558300 | -1.08932100 | -0.60032900 |
| C | -3.28796300 | -1.90818400 | -1.88895600 |
| H | -3.04779200 | -1.21807900 | -2.68996400 |
| H | -4.31977600 | -2.23434700 | -2.01068800 |
| C | -3.59784500 | -2.04626700 | 0.55178200  |
| H | -2.69659000 | -2.63242100 | 0.72170700  |
| H | -4.35285900 | -2.71872600 | 0.14950000  |
| C | -4.39325300 | -0.04942500 | -0.69056700 |
| H | -4.25550100 | 0.63524500  | 0.14144500  |
| H | -5.30863600 | -0.60736100 | -0.50156200 |
| C | -4.09722900 | -1.45658000 | 1.85656100  |
| H | -5.01853200 | -0.88988300 | 1.74190100  |

|   |             |             |             |
|---|-------------|-------------|-------------|
| H | -4.31654500 | -2.30750300 | 2.50179100  |
| H | -3.35775100 | -0.85510500 | 2.37623900  |
| C | -4.54035500 | 0.71532400  | -1.99275000 |
| H | -4.85301500 | 0.07684700  | -2.81615800 |
| H | -5.33310500 | 1.44483000  | -1.82670500 |
| H | -3.65308600 | 1.26606100  | -2.29198500 |
| C | -2.34004000 | -3.08967700 | -1.92104100 |
| H | -2.55245400 | -3.83562600 | -1.15791800 |
| H | -2.47393600 | -3.56787300 | -2.89119000 |
| H | -1.29309000 | -2.79459800 | -1.85691900 |
| C | -1.70719800 | 0.58126900  | 0.65226800  |
| C | -1.88489200 | -0.51500100 | -0.41526300 |
| O | -1.47662900 | 0.10578200  | -1.58955000 |
| H | -2.58511300 | 0.70311400  | 1.27984700  |
| H | -1.25856100 | -1.38173300 | -0.22822300 |
| C | 0.77292900  | -0.31409200 | 1.25569600  |
| C | -0.53645600 | 0.38373700  | 1.63177400  |
| H | 1.51667600  | 0.01509300  | 1.97923100  |
| H | -0.32943400 | 1.34641200  | 2.09273800  |
| O | -1.03882200 | -0.51941700 | 2.63589900  |
| O | 0.46622000  | -1.70617000 | 1.54072800  |
| C | -0.50428300 | -1.74630200 | 2.45509600  |
| O | -0.88535700 | -2.72502600 | 3.01845900  |
| C | -1.34928000 | 1.46163000  | -1.40346500 |
| O | -1.19874400 | 2.22685200  | -2.28898800 |
| O | -1.58773700 | 1.76103400  | -0.12062400 |
| C | 2.79185700  | -0.56713500 | -0.17441700 |
| C | 1.32351700  | -0.16571800 | -0.16917600 |
| H | 0.79566000  | -0.90569400 | -0.79252900 |
| O | 1.07940200  | 1.08267800  | -0.68870300 |
| H | 3.44044700  | -0.02478700 | 0.50570600  |
| C | 3.14079300  | -2.00557400 | -0.42877500 |
| C | 3.38547700  | -0.98313200 | -1.48365300 |
| H | 2.42140500  | -2.80893400 | -0.46115700 |



|   |             |             |             |
|---|-------------|-------------|-------------|
| H | 2.87618700  | -0.89453000 | -2.43060100 |
| O | 4.79391400  | -0.88714900 | -1.58062600 |
| O | 4.42729100  | -2.41126000 | -0.00461500 |
| C | 5.36257400  | -1.72165600 | -0.68861900 |
| O | 6.53626500  | -1.82892800 | -0.51837500 |
| C | 2.13182000  | 2.46807100  | 1.35641400  |
| C | 2.07672000  | 2.39195800  | -0.02806900 |
| H | 3.04742600  | 2.58168700  | 1.91465000  |
| H | 2.93813700  | 2.20108600  | -0.65091000 |
| O | 1.26042700  | 3.42666300  | -0.48847600 |
| O | 1.11928100  | 3.44539700  | 1.70324200  |
| C | 0.65907300  | 3.98572900  | 0.58706700  |
| O | -0.17887000 | 4.84432300  | 0.51070500  |

***TS\_B5***

|   |             |             |             |
|---|-------------|-------------|-------------|
| N | -3.23500600 | -1.11830800 | -0.60671300 |
| C | -3.22084800 | -1.88626200 | -1.92673600 |
| H | -3.01281900 | -1.15765300 | -2.70236800 |
| H | -4.24171800 | -2.24335100 | -2.05359100 |
| C | -3.52161000 | -2.12906600 | 0.50818500  |
| H | -2.60395100 | -2.69155700 | 0.66550900  |
| H | -4.25257600 | -2.80844700 | 0.07418800  |
| C | -4.36778000 | -0.10227900 | -0.65180700 |
| H | -4.22904400 | 0.56617100  | 0.19383400  |
| H | -5.26595500 | -0.68458800 | -0.45638600 |
| C | -4.04642200 | -1.60756400 | 1.83184600  |
| H | -4.97848800 | -1.05537900 | 1.73549400  |
| H | -4.25326600 | -2.49207200 | 2.43486200  |
| H | -3.32000500 | -1.02038800 | 2.38453200  |
| C | -4.56450200 | 0.68561200  | -1.93404900 |
| H | -4.88234500 | 0.05555100  | -2.76199000 |
| H | -5.37073900 | 1.39130800  | -1.73362600 |
| H | -3.69899200 | 1.26374600  | -2.24516800 |

|   |             |             |             |
|---|-------------|-------------|-------------|
| C | -2.23225300 | -3.03151700 | -2.01263400 |
| H | -2.39653400 | -3.80193700 | -1.26204300 |
| H | -2.37541800 | -3.49168900 | -2.99014700 |
| H | -1.19496800 | -2.70030800 | -1.96839500 |
| C | -1.67509600 | 0.50368300  | 0.73393700  |
| C | -1.84952600 | -0.51786300 | -0.40853500 |
| O | -1.49183800 | 0.20162100  | -1.54802100 |
| H | -2.55959700 | 0.57674100  | 1.35937300  |
| H | -1.18777500 | -1.37048300 | -0.30301400 |
| C | 0.86901500  | -0.17348300 | 1.23559100  |
| C | -0.51641500 | 0.23378800  | 1.71617100  |
| H | -0.43881400 | 1.09848800  | 2.36518700  |
| O | -0.96625200 | -0.87368600 | 2.50642300  |
| O | 0.51165100  | -1.82662400 | 1.17599900  |
| C | -0.39464200 | -2.04041400 | 2.08174100  |
| O | -0.76728500 | -3.09862400 | 2.51590000  |
| C | -1.42445000 | 1.54121200  | -1.27377500 |
| O | -1.33361800 | 2.37381100  | -2.10548700 |
| O | -1.55792900 | 1.73826100  | 0.04135400  |
| C | 2.90057800  | -0.36730900 | -0.15962500 |
| C | 1.43479800  | 0.00848400  | -0.17136200 |
| H | 0.90846500  | -0.68178500 | -0.83319400 |
| O | 1.20094100  | 1.26877600  | -0.75199300 |
| H | 3.51786300  | 0.14845800  | 0.56930200  |
| C | 3.27379200  | -1.78828600 | -0.47129800 |
| C | 3.54516000  | -0.71638400 | -1.46765300 |
| H | 2.56059800  | -2.59267400 | -0.55683700 |
| H | 3.06905600  | -0.58716800 | -2.42678300 |
| O | 4.95244000  | -0.59672600 | -1.50458100 |
| O | 4.54611400  | -2.19637100 | -0.01480700 |
| C | 5.49892500  | -1.46581100 | -0.62992100 |
| O | 6.66580700  | -1.56707500 | -0.42001700 |
| C | 1.67406900  | 2.13764700  | 1.45119400  |
| C | 1.83245700  | 2.33488300  | -0.00980200 |

|   |             |             |             |
|---|-------------|-------------|-------------|
| H | 2.55475400  | 2.45104500  | 2.01301600  |
| H | 2.85190900  | 2.43830600  | -0.38325600 |
| O | 1.11243600  | 3.50834200  | -0.34032700 |
| O | 0.61491800  | 3.10793400  | 1.76989300  |
| C | 0.35792600  | 3.86969100  | 0.72373400  |
| O | -0.43432000 | 4.77149600  | 0.68766900  |
| H | 1.58182400  | -0.20382600 | 2.04123300  |

## 5 Cartesian coordinates of the intermediates and minima

### *II*

|   |             |            |             |
|---|-------------|------------|-------------|
| N | 0.60000900  | 2.30778700 | 0.07005500  |
| C | 0.70259800  | 2.67675300 | 1.48400600  |
| H | -0.08833700 | 3.39380300 | 1.70508100  |
| H | 1.65595500  | 3.19632900 | 1.67561300  |
| C | 1.83562300  | 1.67638200 | -0.40168200 |
| H | 2.22913800  | 1.05424800 | 0.40179000  |
| H | 2.60292700  | 2.44066300 | -0.60583700 |
| C | 0.26106500  | 3.47139300 | -0.75397900 |
| H | 0.50321100  | 3.23370800 | -1.79037800 |
| H | 0.89381600  | 4.33101200 | -0.47769700 |
| C | 1.63008300  | 0.80031600 | -1.62852000 |
| H | 1.24836400  | 1.36358200 | -2.48155500 |
| H | 2.57695600  | 0.34963200 | -1.93107600 |
| H | 0.91740900  | 0.00114600 | -1.41378100 |
| C | -1.20844500 | 3.85954300 | -0.68360100 |
| H | -1.52162700 | 4.11377200 | 0.33015000  |
| H | -1.39322300 | 4.73202300 | -1.31283500 |
| H | -1.84124100 | 3.04425300 | -1.03759400 |
| C | 0.55396800  | 1.49417100 | 2.42940600  |
| H | 1.33316500  | 0.74589100 | 2.27838900  |
| H | 0.62269200  | 1.83342400 | 3.46440800  |
| H | -0.41644800 | 1.01276800 | 2.29519600  |

|   |             |             |             |
|---|-------------|-------------|-------------|
| C | -2.42675000 | -0.26222600 | -1.41171300 |
| C | -1.78674600 | 0.14541700  | -0.32937800 |
| O | -2.26433400 | -0.58379200 | 0.74687600  |
| H | -2.38211300 | 0.01387000  | -2.44856500 |
| H | -1.00626100 | 0.87990500  | -0.14457300 |
| C | 0.78137000  | -1.96226600 | 0.90542200  |
| C | 0.61721100  | -2.67035600 | -0.19817600 |
| H | 0.12470700  | -1.66454400 | 1.70144400  |
| H | -0.22184800 | -3.17362500 | -0.64123500 |
| O | 1.82438200  | -2.72731400 | -0.86471900 |
| O | 2.09823500  | -1.55425500 | 0.96811600  |
| C | 2.72265500  | -2.03153400 | -0.13293800 |
| O | 3.86821800  | -1.86475400 | -0.40875000 |
| C | -3.20371500 | -1.43586500 | 0.27988200  |
| O | -3.81938500 | -2.21828300 | 0.93456900  |
| O | -3.32096600 | -1.25494500 | -1.05230500 |

***PI***

|   |             |             |             |
|---|-------------|-------------|-------------|
| N | 0.99615900  | -1.20572100 | -0.02486400 |
| C | 1.77723900  | -1.69076000 | 1.19297300  |
| H | 2.56727900  | -0.96727200 | 1.35787200  |
| H | 2.22706500  | -2.63196400 | 0.88018800  |
| C | -0.14202300 | -2.19977700 | -0.26227900 |
| H | -0.89128900 | -1.99440200 | 0.49909100  |
| H | 0.29207900  | -3.17419400 | -0.04728200 |
| C | 1.92045400  | -1.23060500 | -1.22735800 |
| H | 1.35307400  | -0.85023100 | -2.07074800 |
| H | 2.10254400  | -2.28895500 | -1.40972900 |
| C | -0.78242600 | -2.22292200 | -1.63588900 |
| H | -0.09158300 | -2.52847800 | -2.41881800 |
| H | -1.57218600 | -2.97237600 | -1.58405900 |
| H | -1.26189600 | -1.28605800 | -1.90679400 |
| C | 3.24303700  | -0.49684500 | -1.11873200 |

|   |             |             |             |
|---|-------------|-------------|-------------|
| H | 3.88028300  | -0.87660700 | -0.32337500 |
| H | 3.76221000  | -0.66679500 | -2.06224900 |
| H | 3.13570100  | 0.57826700  | -1.00379000 |
| C | 0.96939300  | -1.86855400 | 2.46247700  |
| H | 0.18964800  | -2.62239300 | 2.37385000  |
| H | 1.66659100  | -2.20664200 | 3.22897900  |
| H | 0.53118200  | -0.93615500 | 2.81621000  |
| C | -0.16134100 | 0.99837600  | -0.85183400 |
| C | 0.40074100  | 0.15296200  | 0.30585100  |
| O | 1.39497200  | 0.96022700  | 0.87362800  |
| H | -0.12423500 | 0.51708400  | -1.82504100 |
| H | -0.36076800 | -0.02149000 | 1.05968500  |
| C | -1.85568600 | 1.79945000  | 0.88617700  |
| C | -1.57158100 | 1.54618500  | -0.55712000 |
| H | -2.66402300 | 2.53376600  | 0.95857600  |
| H | -1.70565100 | 2.42405500  | -1.18769300 |
| O | -2.50805000 | 0.51389600  | -0.99055600 |
| O | -2.54867500 | 0.49260800  | 1.21618900  |
| C | -2.97490600 | -0.09672100 | 0.12031700  |
| O | -3.65692100 | -1.09056700 | 0.07281500  |
| C | 1.53577500  | 2.11175200  | 0.17327700  |
| O | 2.30860900  | 2.96540200  | 0.46100600  |
| O | 0.73991600  | 2.10788800  | -0.89408100 |

***P2***

|   |             |             |             |
|---|-------------|-------------|-------------|
| N | -2.50927400 | -0.28361600 | 0.28901000  |
| C | -2.90886400 | -0.74465000 | 1.69138500  |
| H | -2.50068600 | -1.74193100 | 1.81250500  |
| H | -3.99457300 | -0.81680300 | 1.65917100  |
| C | -3.03320400 | 1.14409100  | 0.11128500  |
| H | -2.38476600 | 1.78580900  | 0.70423100  |
| H | -4.00907300 | 1.13356200  | 0.59244200  |
| C | -3.18846800 | -1.19103400 | -0.72794400 |

|   |             |             |             |
|---|-------------|-------------|-------------|
| H | -2.73264900 | -0.98551700 | -1.69274000 |
| H | -4.21505300 | -0.83272800 | -0.77319800 |
| C | -3.17217100 | 1.69085000  | -1.29657200 |
| H | -3.81699200 | 1.08502200  | -1.92941900 |
| H | -3.64810100 | 2.66567900  | -1.18804200 |
| H | -2.22193600 | 1.86349500  | -1.79292600 |
| C | -3.19839800 | -2.68268100 | -0.44960500 |
| H | -3.79553600 | -2.93862100 | 0.42268800  |
| H | -3.66927500 | -3.14773600 | -1.31576000 |
| H | -2.21281400 | -3.12660400 | -0.34014000 |
| C | -2.46177300 | 0.14442200  | 2.83392900  |
| H | -2.88388300 | 1.14635800  | 2.79027500  |
| H | -2.82761800 | -0.32378500 | 3.74749900  |
| H | -1.37844300 | 0.21143900  | 2.92805500  |
| C | -0.35386000 | -0.09610100 | -1.17529700 |
| C | -0.99093200 | -0.27781700 | 0.21518000  |
| O | -0.49534000 | -1.51075800 | 0.63744000  |
| H | -1.07986300 | 0.16553600  | -1.93892100 |
| H | -0.68426200 | 0.49076600  | 0.91880300  |
| C | 1.76225200  | 1.25377000  | -0.15361500 |
| C | 0.76127700  | 0.95580400  | -1.28868700 |
| H | 2.67232500  | 1.63972000  | -0.61839700 |
| H | 1.28938600  | 0.74689700  | -2.21582100 |
| O | 0.09355400  | 2.21781700  | -1.42046100 |
| O | 1.12320900  | 2.35400000  | 0.52838000  |
| C | 0.25911200  | 2.94847300  | -0.29402700 |
| O | -0.32210900 | 3.96363200  | -0.07495800 |
| C | 0.09601200  | -2.18122700 | -0.40037700 |
| O | 0.46127400  | -3.30094700 | -0.33513100 |
| O | 0.12547600  | -1.39592900 | -1.48162000 |
| C | 3.42168300  | 0.50714900  | 1.69597200  |
| C | 2.16438700  | 0.20800600  | 0.89964300  |
| H | 1.31748600  | -0.01631900 | 1.54601800  |
| O | 2.51297800  | -0.97427200 | 0.16846700  |

|   |            |             |             |
|---|------------|-------------|-------------|
| O | 4.41937200 | 0.00702900  | 0.64948300  |
| C | 3.86534100 | -0.94687300 | -0.03767500 |
| O | 4.40791500 | -1.73583600 | -0.76980000 |
| H | 3.59624700 | 1.59008600  | 1.70465100  |

## ***H2***

|   |             |             |             |
|---|-------------|-------------|-------------|
| N | -2.35745600 | -0.37471100 | 0.17065800  |
| C | -2.82007800 | -0.91546500 | 1.52299600  |
| H | -2.45347000 | -1.93365600 | 1.58764800  |
| H | -3.90625600 | -0.94169800 | 1.45505200  |
| C | -2.86887400 | 1.06319500  | 0.04988700  |
| H | -2.21663600 | 1.67548600  | 0.66948200  |
| H | -3.84693500 | 1.04899100  | 0.52636500  |
| C | -2.98896000 | -1.21514400 | -0.92777000 |
| H | -2.53454500 | -0.90575700 | -1.86488000 |
| H | -4.02891800 | -0.89354300 | -0.95292600 |
| C | -2.99952600 | 1.65943000  | -1.33848700 |
| H | -3.71524000 | 1.12745100  | -1.96084200 |
| H | -3.38034600 | 2.67035400  | -1.19265100 |
| H | -2.05729600 | 1.75757000  | -1.86930800 |
| C | -2.93874300 | -2.72440600 | -0.78368200 |
| H | -3.51636100 | -3.08237300 | 0.06559700  |
| H | -3.40048200 | -3.12884700 | -1.68454500 |
| H | -1.93471600 | -3.13472500 | -0.72342400 |
| C | -2.36572500 | -0.12578600 | 2.73379300  |
| H | -2.70797800 | 0.90739000  | 2.72998200  |
| H | -2.80550700 | -0.61227200 | 3.60417100  |
| H | -1.28429100 | -0.14992900 | 2.86986500  |
| C | -0.10851400 | -0.10149400 | -1.15196300 |
| C | -0.83715300 | -0.36293400 | 0.18362300  |
| O | -0.36889600 | -1.61412800 | 0.57596000  |
| H | -0.78781800 | 0.13542400  | -1.96597100 |
| H | -0.57222200 | 0.36350200  | 0.94500100  |

|   |             |             |             |
|---|-------------|-------------|-------------|
| C | 1.70345400  | 1.42408600  | 0.12707900  |
| C | 0.94647400  | 1.01991300  | -1.15208400 |
| H | 2.64977300  | 1.87150200  | -0.17242000 |
| H | 1.63749400  | 0.81073900  | -1.96485400 |
| O | 0.24530400  | 2.23469300  | -1.44657800 |
| O | 0.86205000  | 2.46338500  | 0.66197500  |
| C | 0.13474400  | 2.98525600  | -0.32855100 |
| O | -0.54824300 | 3.95594700  | -0.24547400 |
| C | 0.36037800  | -2.20081100 | -0.41832900 |
| O | 0.75107700  | -3.31385800 | -0.37706800 |
| O | 0.47744700  | -1.35796000 | -1.45146600 |
| C | 1.68854300  | 0.47518700  | 2.43398200  |
| C | 1.98400600  | 0.35475200  | 1.14715800  |
| H | 1.92444200  | -0.33050000 | 3.11545900  |
| O | 2.48812800  | -0.79112000 | 0.62864300  |
| O | 4.29829400  | 0.35471100  | -0.19833600 |
| C | 3.77914600  | -0.75615400 | -0.12547600 |
| O | 4.07060300  | -1.86646400 | -0.53057900 |
| H | 1.21835800  | 1.36847100  | 2.81892300  |

### ***H3***

|   |             |             |             |
|---|-------------|-------------|-------------|
| N | -2.33969000 | -0.57805300 | -0.03900500 |
| C | -2.94847800 | -1.14878600 | 1.24021300  |
| H | -2.49407100 | -2.12199700 | 1.38655800  |
| H | -4.00368800 | -1.28920700 | 1.01010200  |
| C | -2.95377700 | 0.80478400  | -0.26295500 |
| H | -2.45042500 | 1.47915700  | 0.42714400  |
| H | -3.98512000 | 0.70764900  | 0.07056700  |
| C | -2.71886900 | -1.47941300 | -1.20060800 |
| H | -2.17696200 | -1.12000000 | -2.07080400 |
| H | -3.77475100 | -1.27558200 | -1.37160600 |
| C | -2.93772800 | 1.37281700  | -1.66932300 |
| H | -3.50720900 | 0.77128200  | -2.37425500 |



|   |             |             |             |
|---|-------------|-------------|-------------|
| H | -3.42360500 | 2.34639700  | -1.60252900 |
| H | -1.94082300 | 1.55026200  | -2.06172800 |
| C | -2.51924200 | -2.97404900 | -1.03380200 |
| H | -3.13839000 | -3.39413600 | -0.24428600 |
| H | -2.83642500 | -3.42827400 | -1.97274200 |
| H | -1.48709400 | -3.26679100 | -0.86418300 |
| C | -2.76250100 | -0.30065400 | 2.48219500  |
| H | -3.22750900 | 0.68057800  | 2.40425900  |
| H | -3.25214000 | -0.83148200 | 3.29857500  |
| H | -1.71290700 | -0.18156800 | 2.75639800  |
| C | 0.04393100  | -0.10099100 | -1.01590400 |
| C | -0.84552100 | -0.42562500 | 0.20109200  |
| O | -0.33756300 | -1.63293100 | 0.67588700  |
| H | -0.52772700 | 0.05685800  | -1.92633400 |
| H | -0.75131500 | 0.31841900  | 0.98827900  |
| C | 1.48688000  | 1.60117000  | 0.48107000  |
| C | 0.97032400  | 1.11992600  | -0.88884000 |
| H | 2.46588100  | 2.05808500  | 0.33034100  |
| H | 1.79284800  | 0.96052000  | -1.57955200 |
| O | 0.21256900  | 2.25265000  | -1.33877800 |
| O | 0.56441400  | 2.67081600  | 0.79933100  |
| C | -0.06781500 | 3.06689400  | -0.29871400 |
| O | -0.81025300 | 3.99820400  | -0.37489800 |
| C | 0.63466100  | -2.11163800 | -0.14793200 |
| O | 1.16142400  | -3.16137900 | -0.00573800 |
| O | 0.78768700  | -1.29502600 | -1.19876000 |
| C | 1.01914900  | 0.72393100  | 2.76704400  |
| C | 1.61373700  | 0.53052900  | 1.56155100  |
| O | 2.28748800  | -0.47236300 | 1.14260800  |
| O | 4.13225300  | 0.37171200  | -1.08789200 |
| C | 4.34450100  | -0.65897300 | -0.60141900 |
| O | 4.63229900  | -1.69450600 | -0.18024500 |
| H | 0.49038200  | 1.63832000  | 2.99607400  |
| H | 1.12081800  | -0.02906800 | 3.53863000  |

H4

|   |             |             |             |
|---|-------------|-------------|-------------|
| N | -2.89396800 | -0.49576500 | 0.06981100  |
| C | -3.47022400 | -1.00840700 | 1.38856500  |
| H | -3.01181500 | -1.97391700 | 1.56884000  |
| H | -4.53005100 | -1.15994600 | 1.18928800  |
| C | -3.51363500 | 0.87886300  | -0.20019200 |
| H | -2.99950600 | 1.58337200  | 0.45035100  |
| H | -4.53755000 | 0.79320300  | 0.15816200  |
| C | -3.31606200 | -1.44638500 | -1.03996700 |
| H | -2.79321900 | -1.13652000 | -1.94013000 |
| H | -4.37259200 | -1.23266900 | -1.19162600 |
| C | -3.52589300 | 1.38713600  | -1.62896800 |
| H | -4.11541400 | 0.76021700  | -2.29379500 |
| H | -4.00539500 | 2.36533000  | -1.59030700 |
| H | -2.53791800 | 1.54286100  | -2.05155500 |
| C | -3.14185600 | -2.93527100 | -0.80923400 |
| H | -3.74995000 | -3.30678200 | 0.01233000  |
| H | -3.49396400 | -3.42121000 | -1.71930200 |
| H | -2.11355200 | -3.24985700 | -0.65688800 |
| C | -3.26790500 | -0.10574800 | 2.58851000  |
| H | -3.72155300 | 0.87628200  | 2.47036200  |
| H | -3.75904400 | -0.59322300 | 3.43045600  |
| H | -2.21883900 | 0.00924600  | 2.85890100  |
| C | -0.54269300 | -0.12521800 | -1.02244700 |
| C | -1.38813800 | -0.34160300 | 0.24839900  |
| O | -0.86259400 | -1.50716200 | 0.79747700  |
| H | -1.15116300 | 0.02520900  | -1.90935500 |
| H | -1.28003000 | 0.47012400  | 0.96167000  |
| C | 1.12043400  | 1.60018100  | 0.25630800  |
| C | 0.43489000  | 1.06296700  | -1.00558200 |
| H | 1.98945100  | 2.15521300  | -0.08657000 |
| H | 1.18727000  | 0.88836700  | -1.76999900 |

|   |             |             |             |
|---|-------------|-------------|-------------|
| O | -0.36575600 | 2.20561900  | -1.36603400 |
| O | 0.14843200  | 2.55250700  | 0.75203900  |
| C | -0.59139400 | 2.97124000  | -0.27846400 |
| O | -1.37208000 | 3.87055800  | -0.24742200 |
| C | -0.00784000 | -2.11678000 | -0.08241500 |
| O | 0.46278100  | -3.18487200 | 0.09855100  |
| O | 0.11550300  | -1.37036100 | -1.18243100 |
| C | 2.80264400  | 1.10910100  | 2.05888800  |
| C | 1.53431600  | 0.65748900  | 1.39066600  |
| H | 0.70586400  | 0.58108100  | 2.10451400  |
| O | 1.82661900  | -0.63096700 | 0.89763400  |
| H | 2.88366700  | 2.05164600  | 2.58056900  |
| C | 3.75206200  | 0.22147400  | 1.83727000  |
| C | 3.20920600  | -0.95429300 | 1.06941500  |
| H | 4.78395400  | 0.27118100  | 2.15206700  |
| H | 3.25178600  | -1.87272500 | 1.66015500  |
| O | 3.84718300  | -1.30270800 | -0.11425300 |
| O | 3.43110200  | 0.72196500  | -1.07621900 |
| C | 3.99957900  | -0.37292700 | -1.19258600 |
| O | 4.68410800  | -0.83545800 | -2.10256800 |

### ***H5***

|   |             |             |             |
|---|-------------|-------------|-------------|
| N | -3.05203100 | -0.23813300 | -0.06892100 |
| C | -3.71809600 | -0.87279500 | 1.15032200  |
| H | -3.39275800 | -1.90675600 | 1.17338200  |
| H | -4.78414200 | -0.84964300 | 0.93075500  |
| C | -3.49919600 | 1.22410100  | -0.12808400 |
| H | -2.96641000 | 1.74242300  | 0.66661700  |
| H | -4.55189900 | 1.19852700  | 0.14693600  |
| C | -3.54756700 | -0.95370000 | -1.31715300 |
| H | -2.92791500 | -0.61659500 | -2.14329600 |
| H | -4.54748100 | -0.55676800 | -1.48133800 |
| C | -3.34126000 | 1.96681200  | -1.44104100 |

|   |             |             |             |
|---|-------------|-------------|-------------|
| H | -3.87814000 | 1.49845800  | -2.26290700 |
| H | -3.78591300 | 2.94928300  | -1.28129300 |
| H | -2.30731300 | 2.13654800  | -1.72593400 |
| C | -3.61447400 | -2.46894400 | -1.28471700 |
| H | -4.35451400 | -2.83684400 | -0.57767200 |
| H | -3.93225100 | -2.77855900 | -2.28044000 |
| H | -2.66358400 | -2.95433400 | -1.08377600 |
| C | -3.42405800 | -0.21074800 | 2.48118100  |
| H | -3.74696100 | 0.82729500  | 2.53033700  |
| H | -3.98736500 | -0.76367300 | 3.23266500  |
| H | -2.37330700 | -0.27864500 | 2.76204000  |
| C | -0.64437900 | 0.01381600  | -1.06525900 |
| C | -1.54455200 | -0.29577300 | 0.14475400  |
| O | -1.17358400 | -1.58743700 | 0.50310600  |
| H | -1.19662700 | 0.40963500  | -1.91228700 |
| H | -1.36335200 | 0.37866000  | 0.97632200  |
| C | 1.20363700  | 1.18742900  | 0.53270700  |
| C | 0.49813100  | 1.01635900  | -0.82224200 |
| H | 2.19288100  | 1.59431100  | 0.32576800  |
| H | 1.22947000  | 0.86265300  | -1.61079200 |
| O | -0.09250100 | 2.31768900  | -0.98727200 |
| O | 0.42215700  | 2.23306200  | 1.15811700  |
| C | -0.20762100 | 2.92933900  | 0.21164700  |
| O | -0.82030000 | 3.93666000  | 0.38390200  |
| C | -0.38683800 | -2.15507000 | -0.46825100 |
| O | -0.07795900 | -3.29467900 | -0.47489500 |
| O | -0.17130800 | -1.26604700 | -1.44363900 |
| C | 2.46678500  | 0.14534500  | 2.44278900  |
| C | 1.34547400  | -0.02521400 | 1.45028100  |
| H | 0.39666500  | -0.18419200 | 1.98481300  |
| O | 1.67012500  | -1.12732700 | 0.67328100  |
| H | 2.45447100  | 0.91233900  | 3.20649500  |
| C | 3.41744000  | -0.73992900 | 2.20583700  |
| C | 3.17356500  | -1.60783700 | 0.97823300  |

|   |            |             |             |
|---|------------|-------------|-------------|
| H | 4.34661100 | -0.83086100 | 2.75388100  |
| H | 2.95977900 | -2.66194800 | 1.25290000  |
| O | 3.97786800 | -1.44200200 | -0.00869100 |
| O | 3.88790300 | 1.18919000  | -1.32536400 |
| C | 4.78134000 | 0.47136500  | -1.50696200 |
| O | 5.72688200 | -0.13057100 | -1.78916800 |

**H6**

|   |            |             |             |
|---|------------|-------------|-------------|
| N | 2.84104400 | -0.77968300 | -0.97108100 |
| C | 2.33992200 | -1.84986300 | -1.94609100 |
| H | 2.07765500 | -2.71278700 | -1.34478100 |
| H | 3.21242000 | -2.09757900 | -2.54827100 |
| C | 3.23385800 | 0.44699700  | -1.79893100 |
| H | 2.30485300 | 0.92890600  | -2.09750000 |
| H | 3.68992900 | 0.03870000  | -2.69828400 |
| C | 4.07757000 | -1.30844400 | -0.26490000 |
| H | 4.35998200 | -0.56969700 | 0.47990700  |
| H | 4.84988600 | -1.30197500 | -1.03264600 |
| C | 4.17591600 | 1.45391300  | -1.16905800 |
| H | 5.15721600 | 1.03749700  | -0.95350300 |
| H | 4.31159200 | 2.24009500  | -1.91193900 |
| H | 3.77832800 | 1.93409700  | -0.27943600 |
| C | 4.00350900 | -2.68939600 | 0.35695600  |
| H | 3.83456500 | -3.47334400 | -0.37745800 |
| H | 4.97985700 | -2.86955200 | 0.80690300  |
| H | 3.26586100 | -2.78454000 | 1.14878100  |
| C | 1.16139300 | -1.44905700 | -2.80960400 |
| H | 1.36243500 | -0.58318200 | -3.43833700 |
| H | 0.96980500 | -2.29237200 | -3.47340900 |
| H | 0.24331000 | -1.29256900 | -2.23618000 |
| C | 1.97299900 | 0.41813700  | 1.20030200  |
| C | 1.67935100 | -0.41118000 | -0.06780800 |
| O | 1.08768000 | -1.57065200 | 0.43309700  |

|   |             |             |             |
|---|-------------|-------------|-------------|
| H | 3.00631300  | 0.74892100  | 1.25905900  |
| H | 0.97854900  | 0.08327800  | -0.73282300 |
| C | -0.34522600 | 1.80031900  | 0.96060200  |
| C | 1.12181200  | 1.68101600  | 1.42720900  |
| H | -0.85776100 | 2.48991600  | 1.63388100  |
| H | 1.20590900  | 1.92088000  | 2.48409300  |
| O | 1.74399400  | 2.72690100  | 0.67390800  |
| O | -0.20788900 | 2.44442300  | -0.31813900 |
| C | 0.97563800  | 3.06261800  | -0.38529400 |
| O | 1.32799500  | 3.78524900  | -1.26016500 |
| C | 1.19053400  | -1.63110200 | 1.79093900  |
| O | 0.86452600  | -2.56213400 | 2.43960700  |
| O | 1.76697000  | -0.51341000 | 2.25025200  |
| C | -2.63627300 | 0.79680600  | 0.35122100  |
| C | -1.17652400 | 0.55316800  | 0.77618900  |
| H | -0.77078300 | -0.10871100 | 0.00822000  |
| O | -1.15983900 | -0.16220700 | 2.01599200  |
| H | -2.93431200 | 1.83722300  | 0.50356000  |
| C | -3.39612700 | -0.06809600 | 1.33693000  |
| C | -2.44999300 | -0.57603100 | 2.30466300  |
| H | -4.32457900 | -0.55990600 | 1.08008700  |
| H | -2.49127500 | -1.49914500 | 2.86565600  |
| O | -3.32408600 | 0.46353700  | 2.68117600  |
| C | -2.80374300 | 0.43644700  | -1.14058400 |
| C | -2.38388500 | -0.94210600 | -1.56201400 |
| H | -2.29225300 | 1.20749500  | -1.71876300 |
| H | -2.23143100 | -0.90349300 | -2.65072500 |
| O | -3.72758200 | -1.62818500 | -1.45201400 |
| O | -4.22985200 | 0.52305200  | -1.45044000 |
| C | -4.69488100 | -0.73926800 | -1.53091700 |
| O | -5.87297700 | -0.99027900 | -1.63294700 |

**E2**

|   |             |             |             |
|---|-------------|-------------|-------------|
| N | -2.45959900 | -0.55152800 | 0.00689000  |
| C | -3.07775400 | -1.08948800 | 1.29690100  |
| H | -2.59449700 | -2.03941100 | 1.49474000  |
| H | -4.12104800 | -1.27554700 | 1.04727900  |
| C | -3.12003100 | 0.79666700  | -0.29279000 |
| H | -2.67621000 | 1.51658400  | 0.39186000  |
| H | -4.15954900 | 0.66434200  | 0.00028900  |
| C | -2.78636800 | -1.51790500 | -1.12039100 |
| H | -2.23357300 | -1.18629300 | -1.99461700 |
| H | -3.84230000 | -1.34864500 | -1.32481500 |
| C | -3.06168700 | 1.31512200  | -1.71588300 |
| H | -3.56388600 | 0.66142900  | -2.42525000 |
| H | -3.60027300 | 2.26303300  | -1.70913600 |
| H | -2.05527600 | 1.53306700  | -2.06000800 |
| C | -2.55655000 | -2.99705200 | -0.87607100 |
| H | -3.19613000 | -3.39659900 | -0.09246900 |
| H | -2.82523600 | -3.50100100 | -1.80459900 |
| H | -1.52576000 | -3.25927700 | -0.65518900 |
| C | -2.95871200 | -0.18781400 | 2.50825100  |
| H | -3.43264400 | 0.78248100  | 2.37431800  |
| H | -3.47596300 | -0.69398500 | 3.32305700  |
| H | -1.92721700 | -0.04696100 | 2.82968000  |
| C | -0.07088200 | -0.08007400 | -0.95949600 |
| C | -0.97469000 | -0.33339000 | 0.26186100  |
| O | -0.43141900 | -1.47596200 | 0.84400300  |
| H | -0.63350900 | 0.01426600  | -1.88443600 |
| H | -0.93993600 | 0.48535600  | 0.97435600  |
| C | 1.54198200  | 1.60343600  | 0.40722600  |
| C | 0.83906300  | 1.15347700  | -0.89550300 |
| H | 2.50721400  | 2.02661600  | 0.12859100  |
| H | 1.57271100  | 1.03405100  | -1.68849900 |
| O | 0.00904200  | 2.27766900  | -1.20747100 |
| O | 0.69439300  | 2.69104900  | 0.85092400  |
| C | -0.09981200 | 3.09345700  | -0.13474300 |

|   |             |             |             |
|---|-------------|-------------|-------------|
| O | -0.83882900 | 4.02797000  | -0.09551200 |
| C | 0.50827300  | -2.04328100 | 0.02888500  |
| O | 1.00204400  | -3.09729100 | 0.22567300  |
| O | 0.68997200  | -1.27449800 | -1.05185400 |
| C | 3.01864500  | 0.42557900  | 2.24946800  |
| C | 1.73437500  | 0.62278600  | 1.53530800  |
| H | 0.81118900  | 0.42689600  | 2.08666200  |
| O | 2.45788600  | -0.50306100 | 1.13213400  |
| O | 3.93425700  | 0.21720800  | -1.37962000 |
| C | 4.21245000  | -0.79681300 | -0.89174500 |
| O | 4.54232500  | -1.81704900 | -0.46507900 |
| H | 3.76190400  | 1.04376700  | 1.70668900  |

***E3***

|   |             |             |             |
|---|-------------|-------------|-------------|
| N | -2.62275300 | -1.17458600 | 0.47756500  |
| C | -2.36783300 | -1.92218800 | 1.78835800  |
| H | -1.58371600 | -2.64228000 | 1.58271100  |
| H | -3.29394300 | -2.46159100 | 1.97987600  |
| C | -3.71787900 | -0.13857100 | 0.74507700  |
| H | -3.24773600 | 0.67480300  | 1.29384500  |
| H | -4.40201100 | -0.63817100 | 1.42782400  |
| C | -3.12682100 | -2.17371700 | -0.55495100 |
| H | -3.11754600 | -1.66862300 | -1.51694900 |
| H | -4.16944300 | -2.33889000 | -0.29089800 |
| C | -4.49714400 | 0.40429500  | -0.43736700 |
| H | -5.01678900 | -0.36898200 | -0.99842900 |
| H | -5.25601400 | 1.06272300  | -0.01365900 |
| H | -3.90188900 | 1.01376900  | -1.10985300 |
| C | -2.42291800 | -3.51528700 | -0.64944800 |
| H | -2.56754500 | -4.12269000 | 0.24099000  |
| H | -2.88914100 | -4.04109500 | -1.48271000 |
| H | -1.35924500 | -3.45200900 | -0.86009200 |
| C | -1.98508000 | -1.06446500 | 2.97705800  |



|   |             |             |             |
|---|-------------|-------------|-------------|
| H | -2.74061000 | -0.32694500 | 3.24024700  |
| H | -1.88314600 | -1.74419900 | 3.82286500  |
| H | -1.02025300 | -0.57401000 | 2.85399800  |
| C | -1.26981800 | 0.15750300  | -1.31981700 |
| C | -1.33676200 | -0.46298400 | 0.09114800  |
| O | -0.28542300 | -1.37590500 | 0.09889100  |
| H | -2.21866100 | 0.09551800  | -1.84568300 |
| H | -1.18035800 | 0.27165500  | 0.87663800  |
| C | 0.30427300  | 2.22326700  | -0.56487500 |
| C | -0.84295200 | 1.63012900  | -1.41597300 |
| H | 0.79711000  | 2.99446000  | -1.15811900 |
| H | -0.66675300 | 1.82891700  | -2.47021200 |
| O | -1.96301200 | 2.40595400  | -0.98748800 |
| O | -0.40194400 | 2.87010400  | 0.50632900  |
| C | -1.68280900 | 3.04582300  | 0.17042700  |
| O | -2.48539400 | 3.65316500  | 0.80178800  |
| C | 0.23800800  | -1.53725100 | -1.15308000 |
| O | 1.04716600  | -2.34634500 | -1.43334000 |
| O | -0.35128900 | -0.67966400 | -2.00021100 |
| C | 2.74791700  | 1.52240700  | -0.08868800 |
| C | 1.31568700  | 1.28221800  | 0.01859300  |
| H | 1.02002200  | 0.67159100  | 0.86905500  |
| O | 2.08805800  | 0.58973700  | -0.94946000 |
| H | 3.08754500  | 2.41638600  | -0.60669000 |
| C | 3.68688900  | 0.95756800  | 0.95662100  |
| C | 3.24503200  | -0.27488700 | 1.69137900  |
| H | 3.94434500  | 1.77381400  | 1.63516500  |
| H | 3.84097700  | -0.31616300 | 2.61388100  |
| O | 3.91422300  | -1.31542700 | 0.82543200  |
| O | 4.90186700  | 0.57007700  | 0.23209200  |
| C | 4.88292000  | -0.77423800 | 0.12439300  |
| O | 5.68072500  | -1.37714900 | -0.55651900 |

**B2**

|   |             |             |             |
|---|-------------|-------------|-------------|
| N | 2.81384500  | 0.11554700  | -0.53858700 |
| C | 2.94290700  | 0.28802800  | -2.05698300 |
| H | 2.85680700  | -0.70051600 | -2.49130100 |
| H | 3.96357700  | 0.63897800  | -2.19703300 |
| C | 2.95650300  | 1.51017300  | 0.08507500  |
| H | 2.00516100  | 2.01629100  | -0.07943700 |
| H | 3.70739800  | 2.01103900  | -0.52265700 |
| C | 3.97476300  | -0.74665900 | -0.07993300 |
| H | 3.94757300  | -0.78402700 | 1.00380300  |
| H | 4.85706200  | -0.16948200 | -0.35053100 |
| C | 3.36773300  | 1.56497900  | 1.54239500  |
| H | 4.40465600  | 1.27272600  | 1.69633100  |
| H | 3.26973500  | 2.60611600  | 1.84911000  |
| H | 2.72875900  | 0.98386900  | 2.20273300  |
| C | 4.07470500  | -2.14841500 | -0.64776700 |
| H | 4.09602600  | -2.17706100 | -1.73430000 |
| H | 5.02144700  | -2.55581500 | -0.29327100 |
| H | 3.29863300  | -2.81842100 | -0.28429800 |
| C | 1.95023900  | 1.22771000  | -2.70262400 |
| H | 2.01101100  | 2.24389200  | -2.32031600 |
| H | 2.19579800  | 1.25183800  | -3.76454000 |
| H | 0.92361300  | 0.88067200  | -2.60863100 |
| C | 1.23997800  | -1.20126600 | 1.10781800  |
| C | 1.42033600  | -0.42222000 | -0.22125100 |
| O | 1.05934300  | -1.36485700 | -1.19481300 |
| H | 2.15447100  | -1.22246000 | 1.69493500  |
| H | 0.75613400  | 0.43510200  | -0.31802700 |
| C | -1.25269900 | -0.29816300 | 1.65930100  |
| C | 0.14069100  | -0.78406000 | 2.09873300  |
| H | -1.95652400 | -0.53616800 | 2.45936400  |
| H | 0.04584700  | -1.61338500 | 2.79622600  |
| O | 0.62106800  | 0.35169300  | 2.81355100  |
| O | -1.08170200 | 1.12406100  | 1.64094300  |

|   |             |             |             |
|---|-------------|-------------|-------------|
| C | -0.07011700 | 1.45980800  | 2.45371000  |
| O | 0.19914000  | 2.55603300  | 2.81150100  |
| C | 0.85655200  | -2.59455600 | -0.65501900 |
| O | 0.60825300  | -3.56332000 | -1.28310200 |
| O | 0.97139900  | -2.53110100 | 0.67767800  |
| C | -2.90298700 | 0.22816800  | -0.22308800 |
| C | -1.88226900 | -0.76984100 | 0.35452400  |
| H | -1.14794400 | -1.01128400 | -0.40932700 |
| O | -2.64738200 | -1.94103000 | 0.61573400  |
| O | -4.05885200 | -0.59198000 | -0.43228300 |
| C | -3.88890600 | -1.80552200 | 0.09767800  |
| O | -4.71054200 | -2.66513500 | 0.12019800  |
| H | -3.17026300 | 1.00831700  | 0.48877300  |
| C | -2.45025200 | 0.84836700  | -1.56018200 |
| C | -3.05670800 | 2.16917900  | -1.99427200 |
| H | -2.50726200 | 0.06972300  | -2.32294100 |
| H | -4.03262900 | 2.29187700  | -1.50876200 |
| O | -2.14412200 | 3.07814300  | -1.14412200 |
| O | -1.06043600 | 1.18672300  | -1.37011200 |
| C | -1.00167500 | 2.49713500  | -0.99825400 |
| O | 0.03898700  | 2.97730400  | -0.60204500 |

**B3**

|   |            |             |             |
|---|------------|-------------|-------------|
| N | 3.22846300 | 0.47543000  | -0.81051900 |
| C | 3.22269900 | 0.60854700  | -2.33234000 |
| H | 3.02931300 | -0.38285400 | -2.72617700 |
| H | 4.24297700 | 0.88887400  | -2.58854600 |
| C | 3.49842400 | 1.86648000  | -0.22962300 |
| H | 2.57483300 | 2.43245000  | -0.33410500 |
| H | 4.22688700 | 2.30735200  | -0.90712100 |
| C | 4.36860600 | -0.45461200 | -0.41685100 |
| H | 4.23546100 | -0.69655900 | 0.63398800  |
| H | 5.26334200 | 0.16004200  | -0.49507800 |

|   |             |             |             |
|---|-------------|-------------|-------------|
| C | 4.01518600  | 1.96094200  | 1.19263500  |
| H | 4.96287900  | 1.44704200  | 1.33599400  |
| H | 4.18959400  | 3.02175500  | 1.37373800  |
| H | 3.30126400  | 1.63232100  | 1.94146000  |
| C | 4.56546800  | -1.71735600 | -1.23511100 |
| H | 4.88125000  | -1.50594600 | -2.25434300 |
| H | 5.37275500  | -2.26724800 | -0.75132300 |
| H | 3.70076200  | -2.37438800 | -1.26484300 |
| C | 2.22864000  | 1.59704500  | -2.90573100 |
| H | 2.37537500  | 2.61483800  | -2.54993900 |
| H | 2.38584300  | 1.60273800  | -3.98409100 |
| H | 1.19368300  | 1.29947200  | -2.74041300 |
| C | 1.68774800  | -0.47484300 | 1.07937300  |
| C | 1.84474500  | 0.00809100  | -0.37633200 |
| O | 1.46711500  | -1.10119600 | -1.12697100 |
| H | 2.56646300  | -0.27293100 | 1.68509800  |
| H | 1.18917800  | 0.84056500  | -0.61315900 |
| C | -0.83198200 | 0.50557400  | 1.23905900  |
| C | 0.51097000  | 0.12433200  | 1.87179100  |
| H | -1.55362000 | 0.56945400  | 2.04829400  |
| H | 0.34796300  | -0.50147300 | 2.74482800  |
| O | 0.97177400  | 1.41824700  | 2.29828300  |
| O | -0.56928800 | 1.85703300  | 0.78037900  |
| C | 0.39238500  | 2.37991600  | 1.54665300  |
| O | 0.73025800  | 3.52109900  | 1.55095000  |
| C | 1.40881600  | -2.22438900 | -0.33961700 |
| O | 1.30015500  | -3.31678200 | -0.76935900 |
| O | 1.59377600  | -1.88230900 | 0.94097700  |
| C | -2.88972000 | -0.00426900 | -0.06258800 |
| C | -1.41713100 | -0.30748500 | 0.08165600  |
| H | -0.91338900 | 0.01360700  | -0.83513900 |
| O | -1.15490600 | -1.68279900 | 0.16624900  |
| O | -2.00551600 | -1.69077800 | 2.27497500  |
| C | -1.62469700 | -2.40353000 | 1.33747400  |

|   |             |             |             |
|---|-------------|-------------|-------------|
| O | -1.53813000 | -3.61393400 | 1.19733000  |
| H | -3.49770400 | -0.24171900 | 0.80327300  |
| C | -3.29471400 | 1.18082800  | -0.89471500 |
| C | -3.51085200 | -0.19710000 | -1.41322200 |
| H | -2.60569700 | 1.91547000  | -1.28093900 |
| H | -3.00992000 | -0.66055200 | -2.24862300 |
| O | -4.91307900 | -0.36955800 | -1.41965100 |
| O | -4.58781100 | 1.68832300  | -0.64307500 |
| C | -5.50481200 | 0.74581300  | -0.94843000 |
| O | -6.67902300 | 0.88087400  | -0.81054700 |

**B4**

|   |             |             |             |
|---|-------------|-------------|-------------|
| N | -3.29058300 | -0.38462400 | -0.85854200 |
| C | -3.26147200 | -0.72890800 | -2.33752600 |
| H | -2.75062500 | 0.09300400  | -2.82455500 |
| H | -4.30446200 | -0.73170100 | -2.65349400 |
| C | -3.98020800 | -1.52656700 | -0.13623800 |
| H | -3.32113900 | -2.38753500 | -0.21750300 |
| H | -4.87159500 | -1.73565500 | -0.72641500 |
| C | -4.11535100 | 0.87937500  | -0.68663300 |
| H | -3.98061900 | 1.21154200  | 0.33737500  |
| H | -5.15042600 | 0.55348300  | -0.79025300 |
| C | -4.36221000 | -1.31772700 | 1.31671500  |
| H | -4.98907000 | -0.44173200 | 1.47368700  |
| H | -4.94621700 | -2.19037800 | 1.61029100  |
| H | -3.49945200 | -1.27750500 | 1.97636200  |
| C | -3.82980000 | 2.02352900  | -1.64015400 |
| H | -4.13963700 | 1.79951400  | -2.65960500 |
| H | -4.42923100 | 2.86757400  | -1.29634600 |
| H | -2.78522600 | 2.32992700  | -1.63423100 |
| C | -2.58341900 | -2.03561500 | -2.69857600 |
| H | -3.09369300 | -2.91207200 | -2.30338900 |
| H | -2.60099800 | -2.11045800 | -3.78590300 |

|   |             |             |             |
|---|-------------|-------------|-------------|
| H | -1.53802400 | -2.05580000 | -2.39250400 |
| C | -1.63191400 | 0.49878800  | 0.95917400  |
| C | -1.82090400 | -0.25967900 | -0.37279400 |
| O | -1.08607400 | 0.42732400  | -1.27941700 |
| H | -2.54897500 | 0.57016300  | 1.53840100  |
| H | -1.50687200 | -1.30499800 | -0.29410300 |
| C | 0.82505900  | -0.45762900 | 1.37878600  |
| C | -0.59538900 | -0.13255200 | 1.89542000  |
| H | 1.55615900  | -0.09524700 | 2.09937700  |
| H | -0.52585300 | 0.51572600  | 2.76550700  |
| O | -1.08413200 | -1.40722600 | 2.33009700  |
| O | 0.86144000  | -1.89593200 | 1.40781700  |
| C | -0.23608900 | -2.39016700 | 1.98750700  |
| O | -0.44660500 | -3.54869400 | 2.16805500  |
| C | -0.46876900 | 1.71084100  | -0.66056900 |
| O | -0.52309200 | 2.70206800  | -1.37690200 |
| O | -1.24944300 | 1.77605700  | 0.57172600  |
| C | 2.71099100  | -0.12403800 | -0.20403600 |
| C | 1.21971200  | -0.00580100 | -0.03392700 |
| H | 0.72771200  | -0.67087300 | -0.74931200 |
| O | 0.88358100  | 1.33071900  | -0.29792100 |
| O | 1.38038100  | 2.40627500  | 2.64087700  |
| C | 1.31294600  | 3.31882200  | 1.93028500  |
| O | 1.25934700  | 4.24994300  | 1.25181700  |
| H | 3.30916900  | 0.47633100  | 0.47438700  |
| C | 3.28620500  | -1.44428600 | -0.63666100 |
| C | 3.24218700  | -0.30525900 | -1.59391600 |
| H | 2.72292600  | -2.36190900 | -0.69451100 |
| H | 2.63645200  | -0.22831800 | -2.48303700 |
| O | 4.59191900  | 0.06662600  | -1.78355400 |
| O | 4.65612000  | -1.63126700 | -0.34981500 |
| C | 5.38416800  | -0.71913500 | -1.02773800 |
| O | 6.56772500  | -0.61647700 | -0.95717600 |

**B5**

|   |             |             |             |
|---|-------------|-------------|-------------|
| N | 3.29010200  | -1.05085400 | 0.63499200  |
| C | 3.29259000  | -1.79885800 | 1.96673200  |
| H | 3.05589800  | -1.06625200 | 2.73015100  |
| H | 4.32394400  | -2.12030400 | 2.10453000  |
| C | 3.60233500  | -2.06972800 | -0.46499800 |
| H | 2.69727300  | -2.65571400 | -0.61214600 |
| H | 4.34740000  | -2.72782200 | -0.02251000 |
| C | 4.39758800  | -0.00654400 | 0.66711400  |
| H | 4.25918400  | 0.63116300  | -0.20160700 |
| H | 5.31266300  | -0.57344100 | 0.50701100  |
| C | 4.11655600  | -1.55298200 | -1.79455800 |
| H | 5.04433100  | -0.99292200 | -1.70360500 |
| H | 4.32854100  | -2.43879000 | -2.39374900 |
| H | 3.38729700  | -0.97103400 | -2.34951300 |
| C | 4.54838500  | 0.82548600  | 1.92689500  |
| H | 4.85832000  | 0.22953400  | 2.78243700  |
| H | 5.34441800  | 1.54133000  | 1.72221800  |
| H | 3.66495200  | 1.39623900  | 2.19872700  |
| C | 2.34240800  | -2.97513900 | 2.06288600  |
| H | 2.54821700  | -3.75727800 | 1.33493400  |
| H | 2.48238100  | -3.40635400 | 3.05390000  |
| H | 1.29527300  | -2.68204200 | 1.99161400  |
| C | 1.70865000  | 0.53906700  | -0.71495100 |
| C | 1.89065900  | -0.49004300 | 0.41773800  |
| O | 1.47879800  | 0.20380700  | 1.55242300  |
| H | 2.58742200  | 0.62848000  | -1.34624700 |
| H | 1.26274100  | -1.36617400 | 0.28934900  |
| C | -0.77841100 | -0.37834900 | -1.26682800 |
| C | 0.54205500  | 0.27322400  | -1.68403500 |
| H | -1.50422900 | -0.11249200 | -2.03166300 |
| H | 0.34164800  | 1.19359900  | -2.22690000 |
| O | 1.04479200  | -0.72502400 | -2.59268500 |

|   |             |             |             |
|---|-------------|-------------|-------------|
| O | -0.46554600 | -1.79387200 | -1.38866900 |
| C | 0.50586300  | -1.92693200 | -2.29522000 |
| O | 0.88386200  | -2.95714600 | -2.75872200 |
| C | 1.38419900  | 1.54850300  | 1.29052200  |
| O | 1.23367100  | 2.36457600  | 2.12849700  |
| O | 1.57981300  | 1.76467800  | -0.01336400 |
| C | -2.82936300 | -0.52698000 | 0.13209900  |
| C | -1.37586300 | -0.11349300 | 0.11612600  |
| H | -0.84080700 | -0.73775700 | 0.83877900  |
| O | -1.15426900 | 1.19917400  | 0.55554300  |
| H | -3.45481900 | -0.09043100 | -0.63958100 |
| C | -3.16169100 | -1.92661100 | 0.56847100  |
| C | -3.46531900 | -0.78057700 | 1.46703700  |
| H | -2.42846300 | -2.70060400 | 0.73263200  |
| H | -2.99354700 | -0.55576300 | 2.41066900  |
| O | -4.87475800 | -0.69902500 | 1.49527100  |
| O | -4.41942200 | -2.41069200 | 0.15071300  |
| C | -5.39499300 | -1.65755700 | 0.70153700  |
| O | -6.55768000 | -1.81290500 | 0.50452200  |
| C | -2.03858300 | 2.28529100  | -1.50119300 |
| C | -1.99766800 | 2.24013300  | -0.02276200 |
| H | -2.93682700 | 2.84386800  | -1.78679200 |
| H | -2.97117800 | 2.17925400  | 0.46331500  |
| O | -1.33974400 | 3.42874200  | 0.41221400  |
| O | -0.91439000 | 3.25173900  | -1.74408900 |
| C | -0.63864900 | 3.91244200  | -0.63939900 |
| O | 0.13646900  | 4.82914300  | -0.53792600 |

**B6**

|   |             |             |             |
|---|-------------|-------------|-------------|
| N | -3.06671500 | -1.04375800 | 0.08325400  |
| C | -3.98186600 | -0.04456000 | -0.62081000 |
| H | -3.94949100 | 0.86815300  | -0.03578100 |
| H | -4.97926400 | -0.47262600 | -0.53513300 |



|   |             |             |             |
|---|-------------|-------------|-------------|
| C | -3.09038900 | -2.33260300 | -0.74541000 |
| H | -2.49231900 | -2.13492900 | -1.63056200 |
| H | -4.13450700 | -2.44040800 | -1.03386100 |
| C | -3.64451400 | -1.33862700 | 1.46043300  |
| H | -2.87129300 | -1.85049200 | 2.02774900  |
| H | -4.43613900 | -2.06197500 | 1.27533100  |
| C | -2.61489900 | -3.61121000 | -0.08236200 |
| H | -3.15837500 | -3.85747800 | 0.82783400  |
| H | -2.80903300 | -4.40717200 | -0.80152200 |
| H | -1.54655900 | -3.63059700 | 0.11542900  |
| C | -4.21994400 | -0.18244800 | 2.25991200  |
| H | -5.10535600 | 0.24286000  | 1.79252700  |
| H | -4.52739000 | -0.60117600 | 3.21838700  |
| H | -3.51621000 | 0.61907200  | 2.46502300  |
| C | -3.64626600 | 0.25165800  | -2.06832600 |
| H | -3.69363600 | -0.62637900 | -2.70852200 |
| H | -4.39540800 | 0.96025400  | -2.42135000 |
| H | -2.67495400 | 0.72888400  | -2.19000200 |
| C | -0.60054400 | -1.18631700 | 0.93242600  |
| C | -1.66622500 | -0.44698800 | 0.10438100  |
| O | -1.74762100 | 0.81641700  | 0.71256800  |
| H | -0.97000300 | -2.13029500 | 1.32188000  |
| H | -1.36060500 | -0.36569700 | -0.93263300 |
| C | 1.61407700  | -0.51706700 | -0.46874000 |
| C | 0.78127100  | -1.52699100 | 0.33928100  |
| H | 1.35451900  | -1.74527200 | 1.24222400  |
| O | 0.73445300  | -2.76552100 | -0.33567500 |
| O | -0.38154700 | -1.84018500 | -2.09074600 |
| C | 0.19240400  | -2.85783800 | -1.65867900 |
| O | 0.36631500  | -3.96026900 | -2.15718200 |
| C | -1.08477800 | 0.82430200  | 1.89753400  |
| O | -1.10912500 | 1.72548100  | 2.66733800  |
| O | -0.41926500 | -0.31714900 | 2.05915100  |
| C | 0.90613500  | 1.93997000  | -0.32321600 |

|   |             |             |             |
|---|-------------|-------------|-------------|
| C | 1.91762800  | 0.88774500  | 0.08470000  |
| H | 2.05546200  | 0.87403100  | 1.17126900  |
| O | 3.16596600  | 1.23549300  | -0.54035200 |
| H | 0.07594200  | 1.59422100  | -0.92771900 |
| C | 0.61869700  | 3.13024500  | 0.56188300  |
| C | 1.39178100  | 3.32040700  | -0.68444400 |
| H | 0.99073400  | 3.22720400  | 1.56970800  |
| H | 2.43320700  | 3.58119300  | -0.76809600 |
| O | 0.53706500  | 4.04294600  | -1.54454400 |
| O | -0.61817100 | 3.76813600  | 0.33419000  |
| C | -0.63592500 | 4.26986100  | -0.91760500 |
| O | -1.56697100 | 4.82493700  | -1.40822900 |
| C | 3.01725400  | -1.10723700 | -0.68310600 |
| C | 3.93713500  | 0.11973400  | -0.76383800 |
| H | 3.07499300  | -1.77343600 | -1.53771100 |
| H | 4.50305000  | 0.25327200  | -1.68027500 |
| O | 4.87874800  | -0.09273300 | 0.29413300  |
| O | 3.50158700  | -1.81320500 | 0.46283800  |
| C | 4.56238900  | -1.19079100 | 0.99652200  |
| O | 5.14718500  | -1.56852300 | 1.96223800  |
| H | 1.17016200  | -0.39898100 | -1.45602900 |
